# Supplementary material
Source: PubMed Central journal article supplement (PMC9982273)
Supplement: mmc1.pdf [file mmc1.pdf]

---

# *A systematic review of the impact of the COVID-19 pandemic on breast cancer screening and diagnosis*

---

## Appendices

### Table of Contents

|                                                                                      |    |
|--------------------------------------------------------------------------------------|----|
| Appendix A: Full search strategy .....                                               | 2  |
| Appendix B: Inclusion and exclusion criteria .....                                   | 6  |
| Appendix C: Data extraction .....                                                    | 7  |
| Appendix D: Risk of bias criteria .....                                              | 8  |
| Appendix E: Supplementary figures.....                                               | 9  |
| AppxFigure E.1: Summary of study characterises .....                                 | 9  |
| AppxFigure E.2: Timeline of before and after COVID-19 for each individual study..... | 10 |
| Appendix F: Supplementary tables .....                                               | 11 |
| AppxTable F.1: Study characterises for each individual study .....                   | 11 |
| AppxTable F.2: Risk of bias assessment for each individual study .....               | 14 |
| AppxTable F.3: Summary of positive screens or recalls.....                           | 17 |
| AppxTable F.4: Summary of screening by age .....                                     | 18 |
| AppxTable F.5: Summary of screening by ethnicity or race.....                        | 20 |
| AppxTable F.6: Summary of diagnosis by detection mode .....                          | 23 |
| AppxTable F.7: Summary of stage distribution .....                                   | 25 |
| AppxTable F.8: Summary of mammography volume.....                                    | 31 |
| References .....                                                                     | 34 |

## Appendix A: Full search strategy

### Embase database

Database: Embase Classic <1947 to 1973>, Embase <1974 to 2022 March 16>

Search Strategy:

- 
- 1 cancer screening.mp. or exp cancer screening/ (102768)
  - 2 exp breast cancer/ or breast.mp. (884908)
  - 3 1 and 2 (28570)
  - 4 exp mammography/ or mammogra\$.mp. (70288)
  - 5 3 or 4 (82729)
  - 6 cancer diagnosis.mp. or exp cancer diagnosis/ (718088)
  - 7 2 and 6 (119568)
  - 8 5 or 7 (167043)
  - 9 covid\$.mp. or exp coronavirus disease 2019/ (257193)
  - 10 sars-cov-2.mp. or exp Severe acute respiratory syndrome coronavirus 2/ (102989)
  - 11 coronavir\$.mp. (251743)
  - 12 9 or 10 or 11 (290070)
  - 13 8 and 12 (955)
  - 14 limit 13 to (english language and yr="2020 -Current") (934)

### Medline database

Database: Ovid MEDLINE(R) ALL <1946 to March 18, 2022>

Search Strategy:

- 
- 1 cancer screening.mp. or exp Mass Screening/ (162155)
  - 2 exp Breast Neoplasms/ or breast.mp. (556985)
  - 3 1 and 2 (18236)
  - 4 exp Mammography/ or mammogra\$.mp. (43718)
  - 5 3 or 4 (50743)
  - 6 cancer diagnosis.mp. or exp Diagnosis/ (9065862)
  - 7 2 and 6 (214686)
  - 8 5 or 7 (225091)
  - 9 covid\$.mp. or exp COVID-19/ (230068)
  - 10 sars-cov-2.mp. or exp SARS-CoV-2/ (153138)
  - 11 coronavir\$.mp. (125795)
  - 12 9 or 10 or 11 (254071)
  - 13 8 and 12 (463)
  - 14 limit 13 to (english language and yr="2020 -Current") (444)

### Global Health database

Database: Global Health <1910 to 2022 Week 11>

Search Strategy:

- 
- 1 cancer screening.mp. or exp screening/ (85203)
  - 2 exp breast cancer/ or breast.mp. (94198)
  - 3 1 and 2 (6200)
  - 4 exp mammography/ or mammogra\$.mp. (4996)
  - 5 3 or 4 (7984)
  - 6 cancer diagnosis.mp. or exp diagnosis/ (233530)
  - 7 2 and 6 (5161)

- 8 5 or 7 (10777)
- 9 covid\$.mp. or exp coronavirus disease 2019/ (62672)
- 10 sars-cov-2.mp. or exp severe acute respiratory syndrome coronavirus 2/ (33083)
- 11 coronavir\$.mp. (73071)
- 12 9 or 10 or 11 (75918)
- 13 8 and 12 (97)
- 14 limit 13 to (english language and yr="2020 -Current") (93)

### Evidence-Based Medicine Reviews (EBMR) database

Database: EBM Reviews - NHS Economic Evaluation Database <1st Quarter 2016>, EBM Reviews - Health Technology Assessment <4th Quarter 2016>, EBM Reviews - Cochrane Methodology Register <3rd Quarter 2012>, EBM Reviews - Cochrane Database of Systematic Reviews <2005 to March 16, 2022>, EBM Reviews - ACP Journal Club <1991 to February 2022>, EBM Reviews - Database of Abstracts of Reviews of Effects <1st Quarter 2016>, EBM Reviews - Cochrane Clinical Answers <February 2022>, EBM Reviews - Cochrane Central Register of Controlled Trials <January 2022>

Search Strategy:

- 
- 1 screening.mp. (77080)
  - 2 breast.mp. (60906)
  - 3 1 and 2 (4927)
  - 4 mammogra\$.mp. (3579)
  - 5 3 or 4 (6629)
  - 6 diagnosis.mp. (143502)
  - 7 2 and 6 (7208)
  - 8 5 or 7 (11828)
  - 9 (covid\$ or CO?V2 or COV-2 or coronavir\$ or SARS or pandemic).mp. (13177)
  - 10 8 and 9 (145)
  - 11 limit 10 to (english language and yr="2020 -Current") [Limit not valid in CLCMR,CDSR,ACP Journal Club,DARE,CCA; records were retained] (24)

### Pre-Medline database

Database: PREMEDLINE (Most Recently Published)

Search Strategy:

- 
- 1 screening.mp. or exp Mass Screening/ (3791)
  - 2 exp Breast Neoplasms/ or breast.mp. (2258)
  - 3 1 and 2 (150)
  - 4 mammogra\$.mp. (84)
  - 5 3 or 4 (193)
  - 6 diagnosis.mp. (7715)
  - 7 2 and 6 (259)
  - 8 5 or 7 (419)
  - 9 (covid\$ or CO?V2 or COV-2 or coronavir\$ or SARS or pandemic).mp. (1279)
  - 10 8 and 9 (3)
  - 11 limit 10 to (english language and yr="2020 -Current") (3)

### CINAHL Complete database

| #   | Query      | Limiters/Expanders | Last Run Via          | Results |
|-----|------------|--------------------|-----------------------|---------|
| S12 | S8 AND S11 | Limiters -         | Interface - EBSCOhost | 181     |

|     |                                                                   |                                                                                                                                   |                                                                                                                    |           |
|-----|-------------------------------------------------------------------|-----------------------------------------------------------------------------------------------------------------------------------|--------------------------------------------------------------------------------------------------------------------|-----------|
|     |                                                                   | Published Date:<br>20200101-; English<br>Language<br>Expanders - Apply<br>equivalent subjects<br>Search modes -<br>Boolean/Phrase | Research Databases<br>Search Screen -<br>AdvancedSearch<br>Database - CINAHL<br>Complete                           |           |
| S11 | S9 OR S10                                                         | Expanders - Apply<br>equivalent subjects<br>Search modes -<br>Boolean/Phrase                                                      | Interface - EBSCOhost<br>Research Databases<br>Search Screen -<br>AdvancedSearch<br>Database - CINAHL<br>Complete  | 61,370    |
| S10 | (MH "SARS-CoV-2")<br>OR<br>"sars-cov-2"                           | Expanders - Apply<br>equivalent subjects<br>Search modes -<br>Boolean/Phrase                                                      | Interface - EBSCOhost<br>Research Databases<br>Search Screen -<br>AdvancedSearch<br>Database - CINAHL<br>Complete  | 12,157    |
| S9  | (MH "COVID-19") OR<br>(MH "COVID-19<br>Pandemic") OR<br>"covid\$" | Expanders - Apply<br>equivalent subjects<br>Search modes -<br>Boolean/Phrase                                                      | Interface - EBSCOhost<br>Research Databases<br>Search Screen -<br>AdvancedSearch<br>Database - CINAHL<br>Complete  | 55,042    |
| S8  | S5 OR S7                                                          | Expanders - Apply<br>equivalent subjects<br>Search modes -<br>Boolean/Phrase                                                      | Interface - EBSCOhost<br>Research Databases<br>Search Screen -<br>AdvancedSearch<br>Database - CINAHL<br>Complete  | 64,240    |
| S7  | S1 AND S6                                                         | Expanders - Apply<br>equivalent subjects<br>Search modes -<br>Boolean/Phrase                                                      | Interface - EBSCOhost<br>Research Databases<br>Search Screen -<br>AdvancedSearch<br>Database - CINAHL<br>Complete  | 61,669    |
| S6  | "cancer diagnosis" OR<br>(MH "Diagnosis+")                        | Expanders - Apply<br>equivalent subjects<br>Search modes -<br>Boolean/Phrase                                                      | Interface - EBSCOhost<br>Research Databases<br>Search Screen -<br>AdvancedSearch<br>Database - CINAHL<br>Complete  | 2,063,462 |
| S5  | S3 OR S4                                                          | Expanders - Apply<br>equivalent subjects<br>Search modes -<br>Boolean/Phrase                                                      | Interface - EBSCOhost<br>Research Databases<br>Search Screen -<br>Advanced Search<br>Database - CINAHL<br>Complete | 17,816    |
| S4  | S1 AND S2                                                         | Expanders - Apply                                                                                                                 | Interface - EBSCOhost                                                                                              | 8,751     |

|    |                                                     |                                                                              |                                                                                                                    |         |
|----|-----------------------------------------------------|------------------------------------------------------------------------------|--------------------------------------------------------------------------------------------------------------------|---------|
|    |                                                     | equivalent subjects<br>Search modes -<br>Boolean/Phrase                      | Research Databases<br>Search Screen -<br>Advanced Search<br>Database - CINAHL<br>Complete                          |         |
| S3 | (MH "Mammography")<br>OR "mammogra\$"               | Expanders - Apply<br>equivalent subjects<br>Search modes -<br>Boolean/Phrase | Interface - EBSCOhost<br>Research Databases<br>Search Screen -<br>Advanced Search<br>Database - CINAHL<br>Complete | 13,106  |
| S2 | (MH "Cancer<br>Screening") OR<br>"cancer screening" | Expanders - Apply<br>equivalent subjects<br>Search modes -<br>Boolean/Phrase | Interface - EBSCOhost<br>Research Databases<br>Search Screen -<br>Advanced Search<br>Database - CINAHL<br>Complete | 30,606  |
| S1 | "breast" OR (MH<br>"Breast Neoplasms+")             | Expanders - Apply<br>equivalent subjects<br>Search modes -<br>Boolean/Phrase | Interface - EBSCOhost<br>Research Databases<br>Search Screen -<br>Advanced Search<br>Database - CINAHL<br>Complete | 159,251 |

### Scopes database

( TITLE-ABS-KEY ( breast ) AND TITLE-ABS-KEY ( screening OR diagnosis ) AND TITLE-ABS-KEY ( covid\$ OR co?v2 OR cov-2 OR coronavir\$ OR sars OR pandemic ) ) AND PUBYEAR > 2019 AND ( LIMIT-TO ( LANGUAGE , "English" ) )

Number of results: 772

## Appendix B: Inclusion and exclusion criteria

### 1. Study population

- Screening and assessment: asymptomatic women attending breast cancer screening programs/practice, and recalled women for further assessment.
- Diagnosis: symptomatic women or women with suspicious lesions or newly diagnosed women.
- Studies will be excluded if:
  - o Reporting women with other cancers (unless the data for breast cancer screening/diagnosis are reported separately).
  - o Reporting on women have been diagnosed with breast cancer before COVID-19.
  - o Reporting on women had treatments (e.g. women who underwent surgery).
  - o Including male breast cancer.

### 2. Exposure

- COVID-19 pandemic
- Studies assessing the effects of any intervention or strategy for mitigating the impact of COVID-19 (e.g. implementation of triaging systems or telehealth services) will be excluded.

### 3. Comparison

- Any comparison reporting a change or impact due to COVID-19 (e.g. before vs after COVID-19, or lockdown vs reopen stages).
- Studies without a comparison will be excluded.

### 4. Outcomes

- Screening and assessment: detection measures such as cancer detection rate, recall rate, interval cancer rate; service utilisation such as participation rate and assessment change; other screening-oriented outcome if available.
- Diagnosis: number of diagnosed women; cancer stage at diagnosis; number of diagnostic imaging; other diagnostic outcome if available.
- Studies will be excluded if:
  - o it does not assess the actual impact/change due to COVID-19 (e.g. hypothetical studies of impact of COVID-19, estimated or projected outcomes).
  - o it reports COVID-19 outcome only (e.g. tested positive for COVID-19).
  - o it reports treatment outcome only (e.g. change of surgery/intervention type).

### 5. Study design

- Studies will be excluded if:
  - o Non-clinical studies (e.g. review, animal study, study protocol, survey, editorial, letter, communication, comment, opinion, viewpoint, perspective, guideline/recommendation/statement, .etc.) unless it reported sufficient methods and results of original studies.
  - o Case reports
  - o Modelling studies
  - o Abstract only

### 6. Language

- Non-English language studies will be excluded.

## Appendix C: Data extraction

Because various outcomes were reported across publications, we focused on extracting the main outcomes reported in the included studies. For general medical imaging studies involving multiple imaging modalities, we only extracted data of mammography because other modalities could include examinations of organ sites other than breast (unless data were separately reported for the breast). For breast imaging studies, we extracted data of all imaging modalities where relevant.

There was inconsistency between studies in the estimates of effect reported for each outcome (e.g. frequency, proportion, rate, ratio etc). We therefore extracted the outcome data in the original format (i.e. how it was reported in the included study).

Data presented only in figures without any associated numeric values were extracted using open-source software PlotDigitizer (<https://plotdigitizer.com/app>), and these data were averaged between two authors' extractions.

When the study used data for more than 1 year (e.g. 2018 and 2019) as the pre-pandemic cohort, we extracted the data of the most recent year.

For studies which did not present cumulative numbers over the periods and only presented data by month (or fortnight or week or day), we did not extract every time point. Instead, we conducted an aggregation when the study reported raw data. Generally, we aggregated a pandemic period and the same time period in the previous year, to make an 'pre' versus 'post' pandemic comparison. When the study did not report raw data and only reported the relative change, we extracted the range of the relative change, and/or the change at the beginning of the decline and time of the 'nadir' before starting to recover.

For studies which did not report the change between pre-pandemic or comparison outcome (outcome\_A) and pandemic outcome (outcome\_B), we computed the change: i) when the reported outcome was presented in frequency format only, relative percentage change was calculated by  $100\% * ((\text{outcome\_B} - \text{outcome\_A}) / \text{outcome\_A})$ ; ii) when the reported outcome was presented in rate or distribution using proportion (or both proportion and frequency), absolute change of the value was calculated, i.e.  $\text{change (in \%)} = \text{outcome\_B} - \text{outcome\_A}$ .

#### Appendix D: Risk of bias criteria

- Criterion 1: Study question  
Was the study question or objective clearly stated?
- Criterion 2: Eligibility criteria and study population  
Were eligibility/selection criteria for the study population prespecified and clearly described?
- Criterion 3: Study participants representative of clinical populations of interest  
Were the participants in the study representative of those who would have the exposure in the general or clinical population of interest?
- Criterion 4: All eligible participants enrolled  
Were all eligible participants that met the prespecified entry criteria enrolled?
- Criterion 5: Sample size  
Was the sample size sufficiently large to provide confidence in the findings?
- Criterion 6: Exposure clearly described  
Was the exposure clearly described and consistent across the study population?
- Criterion 7: Exposure unlikely to affect data collection  
Were sources and methods of data collection the same before and after the intervention?
- Criterion 8: Exposure independent of other changes  
Were there compelling arguments that the exposure occurred independently of other changes over time, and was the outcome not influenced by other confounding variables/historic events during study period?
- Criterion 9: Outcome measures clearly described, valid, and reliable  
Were the outcome measures prespecified, clearly defined, valid, reliable, and assessed consistently across all study participants?
- Criterion 10: Statistical analysis  
Did the statistical methods examine changes in outcome measures from before to after the exposure? Were statistical tests done that provided p values for the pre-to-post changes?
- Criterion 11: Multiple outcome measures  
Were outcome measures of interest taken multiple times before the exposure and multiple times after the exposure?
- Criterion 12: Other risks of bias  
Was there no evidence of other risk of biases?



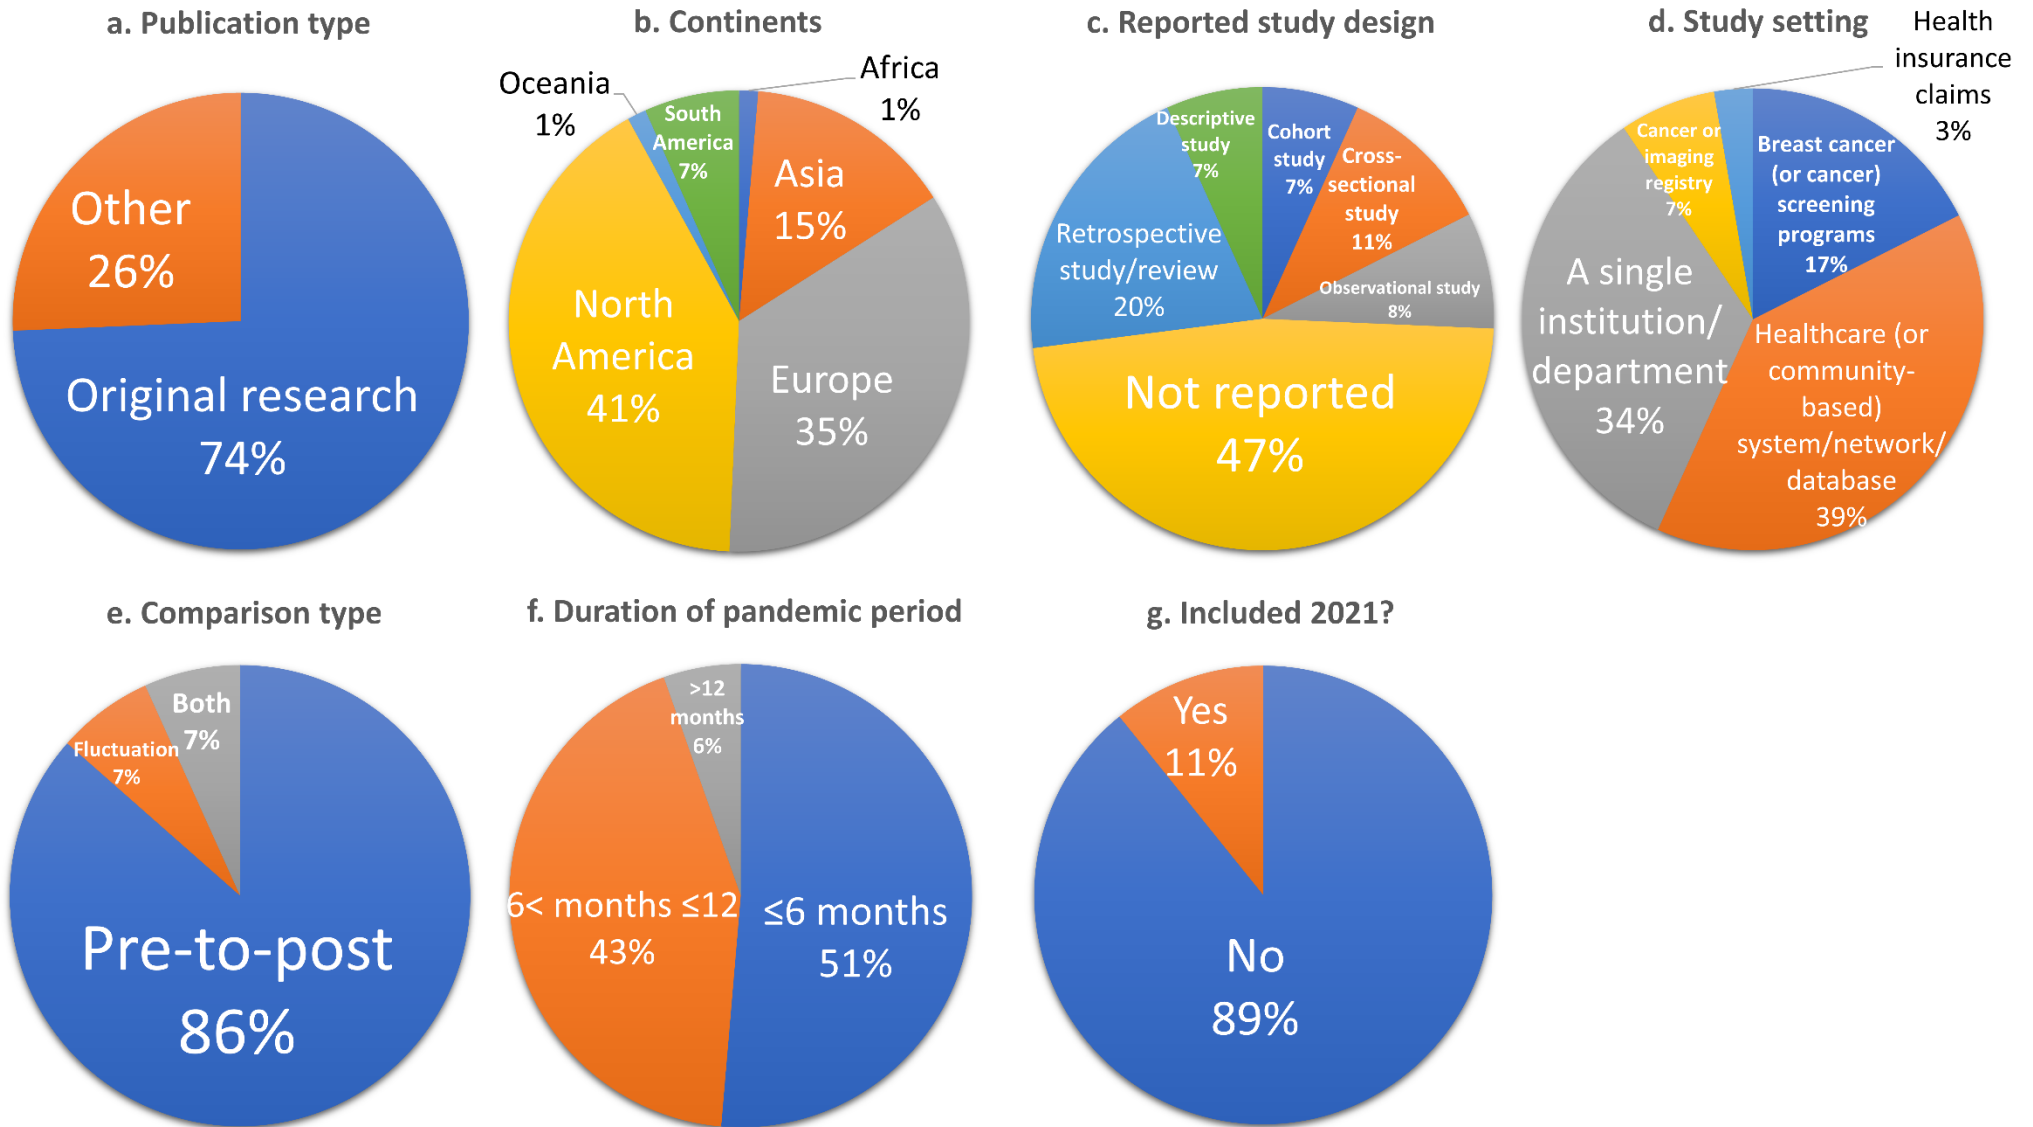

a: Publication type ('Other' includes letters, communications, editorials, and brief reports); b: Continents; c: Study design as reported in each study; d: Study setting; e: Comparison type; f: Duration of reported COVID-19 period; g: Whether the pandemic period included any time in 2021.

AppxFigure E.2: Timeline of before and after COVID-19 for each individual study

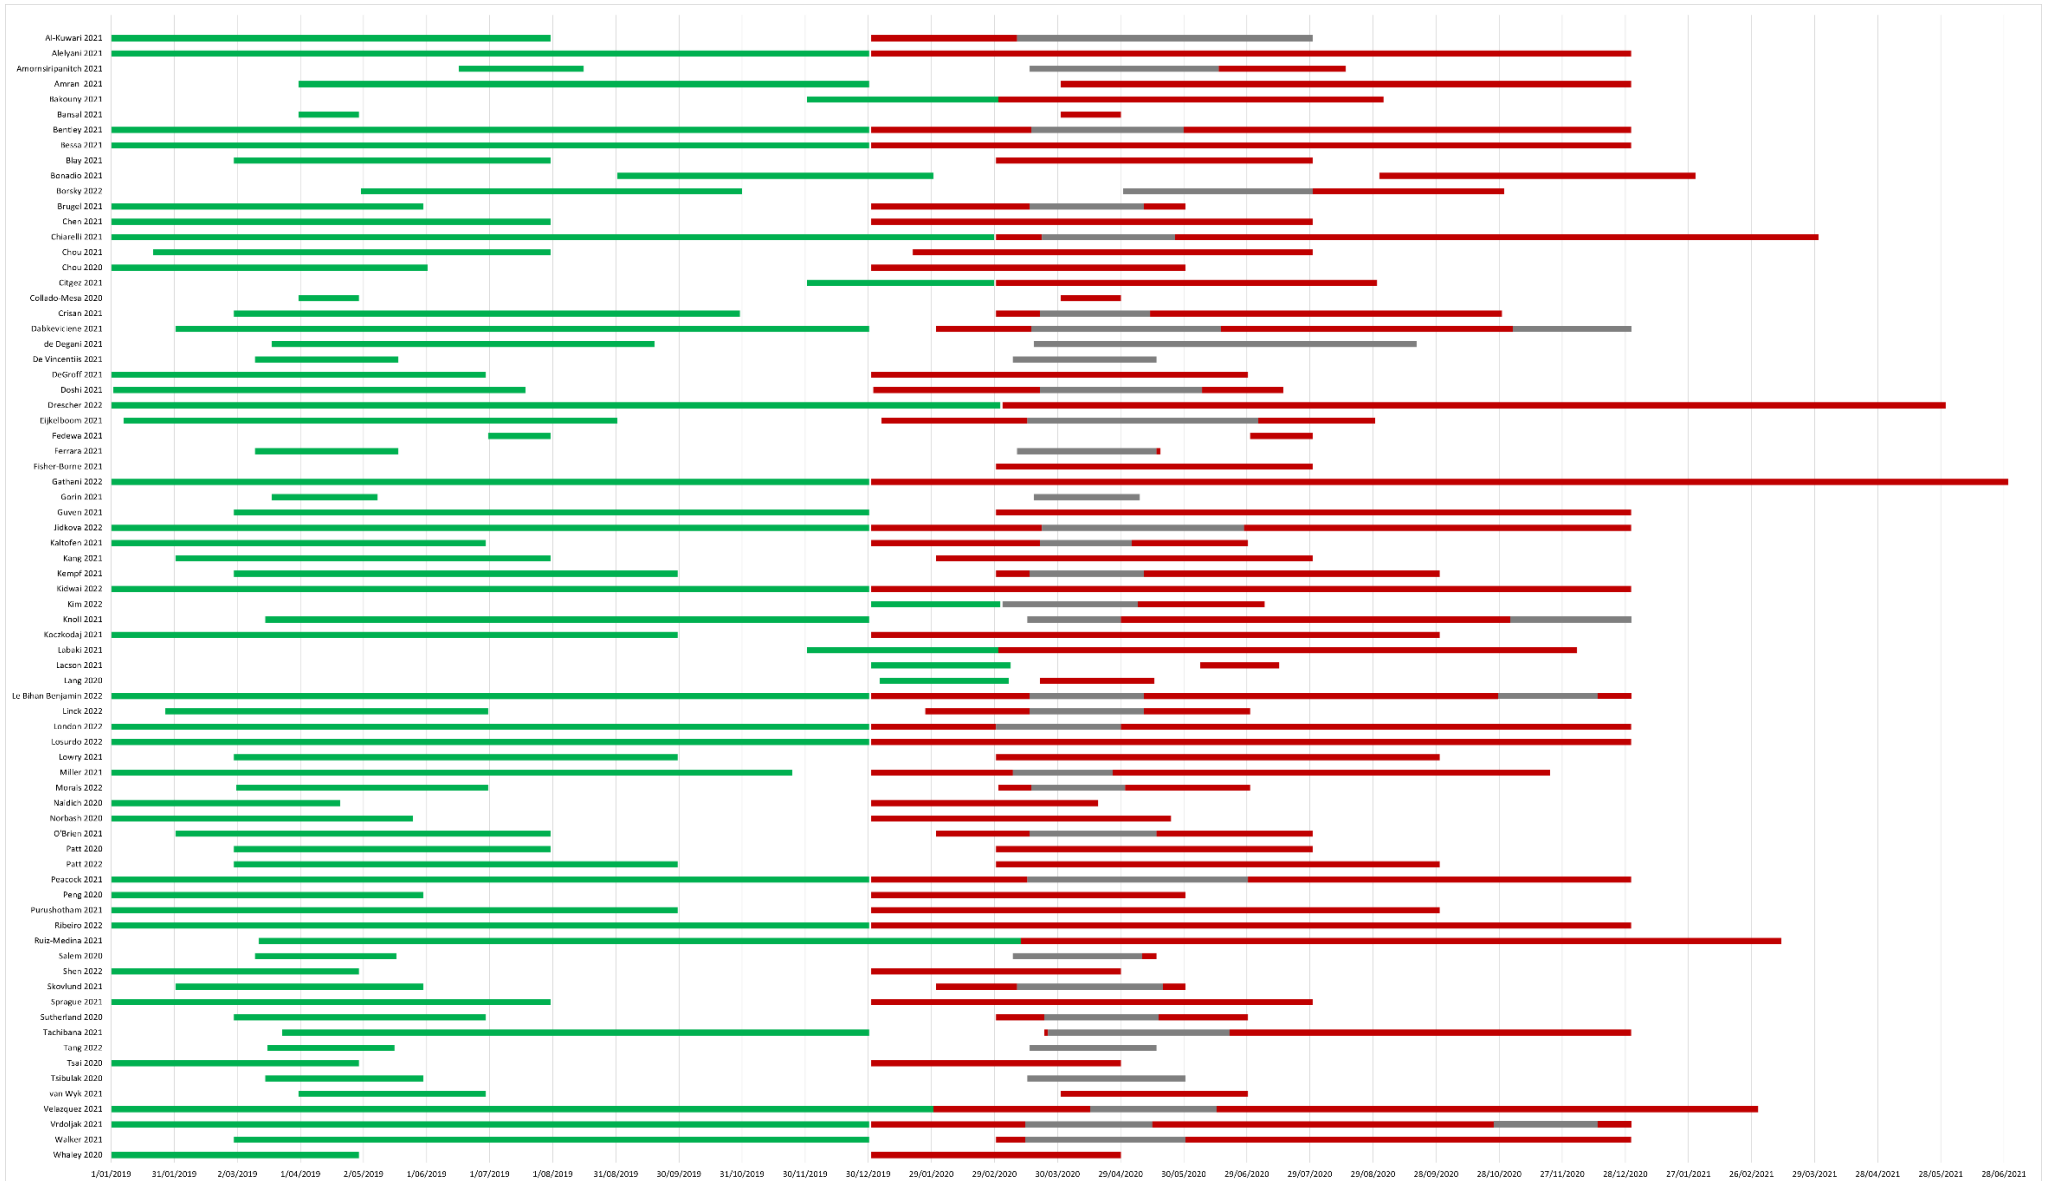

Green bar represents the period of pre-pandemic (or comparison) group; Red bar represents the period of pandemic group; Grey bar represents the period/s of service suspension or regional lockdown (where reported). For each study, we used the longest period (i.e. the very start and very end points) for both groups; therefore the time period was not necessarily matched with the study period of each outcome presented in tables 1-2 and AppxTables F.3-F.8.

## Appendix F: Supplementary tables

AppxTable F.1: Study characterises for each individual study

| Study                     | Country or Region | Healthcare setting or data source                                                            | Publication type* | Reported study design**    | Comparison type***        | Duration of reported pandemic period (months) | Including any time in 2021 |
|---------------------------|-------------------|----------------------------------------------------------------------------------------------|-------------------|----------------------------|---------------------------|-----------------------------------------------|----------------------------|
| Al-Kuwari 2021 [1]        | Qatar             | 27 Primary Health Care Corporation health centres                                            | Original research | Retrospective study/review | Pre-to-post               | 7                                             | No                         |
| Alelyani 2021 [2]         | Saudi Arabia      | 3 hospitals in the region                                                                    | Original research | Retrospective study/review | Pre-to-post               | 12                                            | No                         |
| Amornsiripanitch 2021 [3] | US                | Various centres from one institution                                                         | Original research | Retrospective study/review | Pre-to-post               | 5                                             | No                         |
| Amran 2021 [4]            | US                | A large statewide non-profit community health care system                                    | Other             | Observational study        | Pre-to-post               | 9                                             | No                         |
| Bakouny 2021 [5]          | US                | A large health care system with a centralized repository of clinical and administrative data | Other             | Observational study        | Pre-to-post & Fluctuation | 6                                             | No                         |
| Bansal 2021 [6]           | UK                | A symptomatic breast clinic in a university hospital                                         | Original research | Retrospective study/review | Pre-to-post               | 1                                             | No                         |
| Bentley 2021 [7]          | Canada            | Breasts screening program                                                                    | Other             | Not reported               | Pre-to-post               | 12                                            | No                         |
| Bessa 2021 [8]            | Brazil            | Standard screening program                                                                   | Original research | Cross-sectional study      | Pre-to-post               | 12                                            | No                         |
| Blay 2021 [9]             | France            | French Federation of Comprehensive Cancer Centres (Unicancer network)                        | Original research | Not reported               | Pre-to-post               | 5                                             | No                         |
| Bonadio 2021 [10]         | Brazil            | A tertiary cancer centre                                                                     | Original research | Cross-sectional study      | Pre-to-post               | 5                                             | Yes                        |
| Borsky 2022 [11]          | UK                | A breast unit                                                                                | Other             | Cohort study               | Pre-to-post               | 6                                             | No                         |
| Brugel 2021 [12]          | France            | A tertiary care centre and a general hospital                                                | Other             | Not reported               | Pre-to-post               | 5                                             | No                         |
| Chen 2021 [13]            | US                | A large national commercial insurance carrier                                                | Original research | Cohort study               | Pre-to-post               | 7                                             | No                         |
| Chiarelli 2021 [14]       | Canada            | Ontario Breast Screening Program                                                             | Original research | Descriptive study          | Fluctuation               | 12                                            | Yes                        |
| Chou 2021 [15]            | Taiwan            | A public, academic medical centre                                                            | Original research | Retrospective study/review | Pre-to-post               | 6.5                                           | No                         |
| Chou 2020 [16]            | Taiwan            | A public, academic medical centre                                                            | Other             | Retrospective study/review | Pre-to-post               | 5                                             | No                         |
| Citgez 2021 [17]          | Turkey            | A tertiary university hospital                                                               | Original research | Retrospective study/review | Fluctuation               | 6                                             | Yes                        |
| Collado-Mesa 2020 [18]    | US                | 5 breast imaging centres                                                                     | Other             | Observational study        | Pre-to-post               | 1                                             | No                         |
| Crisan 2021 [19]          | Romania           | A large tertiary oncological centre                                                          | Original research | Not reported               | Pre-to-post               | 8                                             | No                         |
| Dabkeviciene 2021 [20]    | Lithuania         | National Cancer Institute (a cancer treatment-dedicated hospital)                            | Original research | Not reported               | Pre-to-post               | 11                                            | No                         |
| de Degani 2021 [21]       | Argentina         | National screening information system, and local cancer registry                             | Original research | Cross-sectional study      | Pre-to-post               | 6                                             | No                         |
| De Vincentiis 2021 [22]   | Italy             | A pathology unit of a secondary care hospital network                                        | Other             | Not reported               | Pre-to-post               | 2                                             | No                         |
| DeGroff 2021[23]          | US                | National Breast and Cervical Cancer Early Detection Program                                  | Original research | Not reported               | Pre-to-post               | 6                                             | No                         |

|                             |             |                                                                                                                                                                |                   |                            |                           |     |     |
|-----------------------------|-------------|----------------------------------------------------------------------------------------------------------------------------------------------------------------|-------------------|----------------------------|---------------------------|-----|-----|
| Doshi 2021 [24]             | US          | A large, metropolitan hospital system consisting of 6 outpatient practices                                                                                     | Original research | Retrospective study/review | Pre-to-post & Fluctuation | 7.5 | No  |
| Drescher 2022 [25]          | US          | A large, community-based health care system of 40 inpatient or outpatient facilities                                                                           | Original research | Cross-sectional study      | Pre-to-post & Fluctuation | 14  | Yes |
| Eijkelboom 2021 [26]        | Netherlands | Netherlands Cancer Registry                                                                                                                                    | Original research | Not reported               | Pre-to-post               | 8   | No  |
| Fedewa 2021 [27]            | US          | 32 community health centres                                                                                                                                    | Other             | Not reported               | Pre-to-post               | 1   | No  |
| Ferrara 2021 [28]           | Italy       | 7 anatomic pathology units serving secondary care hospital networks                                                                                            | Original research | Not reported               | Pre-to-post               | 2   | No  |
| Fisher-Borne 2021 [29]      | US          | 22 federally qualified health centres                                                                                                                          | Original research | Not reported               | Pre-to-post               | 5   | No  |
| Gathani 2022 [30]           | UK          | National Health Service (NHS) cancer service activity data                                                                                                     | Other             | Not reported               | Fluctuation               | 18  | Yes |
| Gorin 2021 [31]             | US          | A large, midwestern private medical centre                                                                                                                     | Other             | Descriptive study          | Pre-to-post               | 1.5 | No  |
| Guyen 2021 [32]             | Turkey      | A medical oncology clinic                                                                                                                                      | Other             | Not reported               | Pre-to-post               | 10  | No  |
| Jidkova 2022 [33]           | Belgium     | Population-based cancer screening program                                                                                                                      | Original research | Not reported               | Pre-to-post               | 12  | No  |
| Kaltofen 2021 [34]          | Germany     | A tertiary academic gynaeco-oncological centre                                                                                                                 | Original research | Not reported               | Pre-to-post               | 5   | No  |
| Kang 2021 [35]              | Korea       | A clinical data warehouse of 6 university hospitals                                                                                                            | Original research | Retrospective study/review | Pre-to-post               | 6   | No  |
| Kempf 2021 [36]             | France      | A clinical data warehouse of Greater Paris University hospitals (comprising 39 specialised health care centres)                                                | Original research | Not reported               | Pre-to-post               | 7   | No  |
| Kidwai 2022 [37]            | US          | A Veteran Affairs primary care clinic                                                                                                                          | Other             | Not reported               | Pre-to-post               | 12  | No  |
| Kim 2022 [38]               | US          | A large, nonprofit academic health system                                                                                                                      | Original research | Retrospective study/review | Pre-to-post & Fluctuation | 4   | No  |
| Knoll 2021 [39]             | Austria     | A tertiary referral centre                                                                                                                                     | Original research | Not reported               | Pre-to-post               | 9.5 | No  |
| Koczkodaj 2021 [40]         | Poland      | National Health Fund                                                                                                                                           | Original research | Not reported               | Pre-to-post               | 9   | No  |
| Labaki 2021 [41]            | US          | A large healthcare system comprising 7 hospitals                                                                                                               | Other             | Observational study        | Pre-to-post               | 9   | No  |
| Lacson 2021 [42]            | US          | An urban academic quaternary care hospital with 8 affiliated outpatient facilities                                                                             | Original research | Cohort study               | Pre-to-post               | 1   | No  |
| Lang 2020 [43]              | US          | A large urban academic hospital and its affiliated imaging centres                                                                                             | Original research | Descriptive study          | Fluctuation               | 2   | No  |
| Le Bihan Benjamin 2022 [44] | France      | French National Cancer Institute (French administrative healthcare database, and Medicalised information system programme from all French hospital facilities) | Original research | Not reported               | Pre-to-post               | 12  | No  |
| Linck 2022 [45]             | France      | A tertiary cancer centre                                                                                                                                       | Original research | Observational study        | Fluctuation               | 5   | No  |
| London 2022 [46]            | US          | A health research network of 22 US health care organizations, and tumour registry data                                                                         | Original research | Not reported               | Pre-to-post               | 16  | Yes |
| Losurdo 2022 [47]           | Italy       | Osservatorio Nazionale Screening Program                                                                                                                       | Original research | Not reported               | Pre-to-post               | 12  | No  |
| Lowry 2021 [48]             | US          | 7 breast imaging registries within the Breast Cancer Surveillance Consortium                                                                                   | Original research | Not reported               | Pre-to-post               | 7   | No  |
| Miller 2021 [49]            | US          | Electronic medical record from one institution                                                                                                                 | Original research | Retrospective study/review | Pre-to-post               | 11  | No  |
| Morais 2022 [50]            | Portugal    | A cancer-dedicated hospital                                                                                                                                    | Original research | Not reported               | Pre-to-post               | 4   | No  |

|                       |              |                                                                                                                   |                   |                            |                           |     |     |
|-----------------------|--------------|-------------------------------------------------------------------------------------------------------------------|-------------------|----------------------------|---------------------------|-----|-----|
| Naidich 2020 [51]     | US           | A large health care system                                                                                        | Original research | Retrospective study/review | Pre-to-post               | 4.5 | No  |
| Norbash 2020 [52]     | US           | 6 academic medical systems and a large national private practice coalition                                        | Original research | Not reported               | Pre-to-post               | 6   | No  |
| O'Brien 2021 [53]     | Ireland      | A tertiary referral symptomatic breast cancer centre                                                              | Other             | Not reported               | Pre-to-post               | 6   | No  |
| Patt 2020 [54]        | US           | A large medical claims clearinghouse database                                                                     | Original research | Retrospective study/review | Pre-to-post               | 5   | No  |
| Patt 2022 [55]        | US           | A multipayer database                                                                                             | Original research | Not reported               | Pre-to-post               | 7   | No  |
| Peacock 2021 [56]     | Belgium      | Pathology laboratories (of the Belgian Cancer Registry)                                                           | Original research | Not reported               | Pre-to-post               | 12  | No  |
| Peng 2020 [57]        | Taiwan       | Population-based breast cancer screening program                                                                  | Other             | Not reported               | Pre-to-post               | 5   | No  |
| Purushotham 2021 [58] | UK           | A major cancer hospital network (South East London Cancer Alliance)                                               | Original research | Not reported               | Pre-to-post               | 9   | No  |
| Ribeiro 2022 [59]     | Brazil       | Brazilian National Health Service Outpatient Information Systems, and Cancer Information System                   | Original research | Descriptive study          | Pre-to-post               | 12  | No  |
| Ruiz-Medina 2021 [60] | Spain        | 2 university-affiliated hospitals                                                                                 | Original research | Cross-sectional study      | Pre-to-post               | 12  | Yes |
| Salem 2020 [61]       | Lebanon      | The radiology department of a single university hospital institution                                              | Original research | Descriptive study          | Pre-to-post               | 2   | No  |
| Shen 2022 [62]        | Taiwan       | The nationwide cancer screening registry database                                                                 | Original research | Cross-sectional study      | Pre-to-post               | 4   | No  |
| Skovlund 2021 [63]    | Denmark      | National cancer registry and national patient register                                                            | Other             | Not reported               | Pre-to-post               | 4   | No  |
| Sprague 2021 [64]     | US           | 6 breast imaging registries within a network of breast imaging facilities (Breast Cancer Surveillance Consortium) | Original research | Not reported               | Pre-to-post               | 7   | No  |
| Sutherland 2020 [65]  | Australia    | Breast cancer screening program (BreastScreen NSW, Cancer Institute NSW)                                          | Original research | Not reported               | Pre-to-post               | 4   | No  |
| Tachibana 2021 [66]   | Brazil       | A breast imaging centre in a private hospital                                                                     | Original research | Cohort study               | Pre-to-post               | 9   | No  |
| Tang 2022 [67]        | US           | A large integrated health care system (21 medical centres with more than 250 outpatient facilities)               | Original research | Cohort study               | Pre-to-post               | 2   | No  |
| Tsai 2020 [68]        | Taiwan       | A national screening database                                                                                     | Other             | Not reported               | Pre-to-post               | 4   | No  |
| Tsibulak 2020 [69]    | Austria      | 18 gynaecological departments                                                                                     | Original research | Not reported               | Pre-to-post               | 2.5 | No  |
| van Wyk 2021 [70]     | South Africa | An anatomical pathology laboratory in one institution                                                             | Original research | Retrospective study/review | Pre-to-post               | 3   | No  |
| Velazquez 2021 [71]   | US           | An urban integrated health system's safety-net hospital                                                           | Other             | Cross-sectional study      | Pre-to-post               | 13  | Yes |
| Vrdoljak 2021 [72]    | Croatia      | 25 Croatian hospitals                                                                                             | Original research | Retrospective study/review | Pre-to-post & Fluctuation | 12  | No  |
| Walker 2021 [73]      | Canada       | Cancer screening programs                                                                                         | Original research | Observational study        | Pre-to-post               | 12  | No  |
| Whaley 2020 [74]      | US           | Health insurance claims                                                                                           | Original research | Cross-sectional study      | Pre-to-post               | 4   | No  |

\* 'Other' publication type includes letters, communications, editorials, and brief reports.

\*\* This is the study design reported in each study (i.e. not judged by the authors).

\*\*\* Comparison of dichotomous 'pre-to-post' time periods includes pre vs during, pre vs peak/shutdown, and pre vs after-peak/reopening; Comparison of 'fluctuation' includes changes over multiple time points before and during the pandemic period, such as pre vs shutdown vs reopen.

AppxTable F.2: Risk of bias assessment for each individual study

| <b>Study</b>              | <b>Criterion</b> | <b>1</b>       | <b>2</b>                                  | <b>3</b>                                                              | <b>4</b>                           | <b>5</b>    | <b>6</b>                   | <b>7</b>                                    | <b>8</b>                              | <b>9</b>                                                | <b>10</b>            | <b>11</b>                 | <b>12</b>           | <b>Overall</b> |
|---------------------------|------------------|----------------|-------------------------------------------|-----------------------------------------------------------------------|------------------------------------|-------------|----------------------------|---------------------------------------------|---------------------------------------|---------------------------------------------------------|----------------------|---------------------------|---------------------|----------------|
|                           |                  | Study question | Eligibility criteria and study population | Study participants representative of clinical populations of interest | All eligible participants enrolled | Sample size | Exposure clearly described | Exposure unlikely to affect data collection | Exposure independent of other changes | Outcome measures clearly described, valid, and reliable | Statistical analysis | Multiple outcome measures | Other risks of bias |                |
| Al-Kuwari 2021 [1]        | Y                | Y              | Y                                         | Y                                                                     | Y                                  | Y           | Y                          | Y                                           | NR                                    | Y                                                       | N                    | Y                         | NR                  | High           |
| Alelyani 2021 [2]         | Y                | Y              | Y                                         | Y                                                                     | Y                                  | Y           | Y                          | Y                                           | NR                                    | Y                                                       | Y                    | Y                         | NR                  | Unclear        |
| Amornsiripanitch 2021 [3] | Y                | Y              | N                                         | Y                                                                     | Y                                  | Y           | Y                          | Y                                           | Y                                     | Y                                                       | Y                    | N                         | N                   | High           |
| Amran 2021 [4]            | Y                | Y              | Y                                         | Y                                                                     | Y                                  | Y           | Y                          | Y                                           | NR                                    | Y                                                       | Y                    | N                         | N                   | High           |
| Bakouny 2021 [5]          | Y                | Y              | Y                                         | Y                                                                     | Y                                  | Y           | Y                          | Y                                           | NR                                    | Y                                                       | N                    | N                         | N                   | High           |
| Bansal 2021 [6]           | Y                | Y              | N                                         | Y                                                                     | N                                  | Y           | Y                          | Y                                           | N                                     | N                                                       | N                    | N                         | N                   | High           |
| Bentley 2021 [7]          | Y                | N              | Y                                         | NR                                                                    | Y                                  | Y           | Y                          | Y                                           | NR                                    | Y                                                       | N                    | Y                         | NR                  | High           |
| Bessa 2021 [8]            | Y                | Y              | Y                                         | Y                                                                     | Y                                  | Y           | Y                          | Y                                           | N                                     | N                                                       | N                    | Y                         | NR                  | High           |
| Blay 2021 [9]             | Y                | Y              | Y                                         | Y                                                                     | Y                                  | Y           | Y                          | Y                                           | NR                                    | Y                                                       | N                    | Y                         | NR                  | High           |
| Bonadio 2021 [10]         | Y                | Y              | N                                         | Y                                                                     | N                                  | Y           | Y                          | Y                                           | NR                                    | Y                                                       | Y                    | N                         | NR                  | High           |
| Borsky 2022 [11]          | Y                | Y              | N                                         | Y                                                                     | N                                  | Y           | Y                          | Y                                           | NR                                    | Y                                                       | Y                    | N                         | Y                   | High           |
| Brugel 2021 [12]          | Y                | N              | Y                                         | NR                                                                    | Y                                  | Y           | Y                          | Y                                           | NR                                    | Y                                                       | N                    | Y                         | N                   | High           |
| Chen 2021 [13]            | Y                | Y              | Y                                         | Y                                                                     | Y                                  | Y           | Y                          | Y                                           | Y                                     | N                                                       | Y                    | Y                         | Y                   | High           |
| Chiarelli 2021 [14]       | Y                | Y              | Y                                         | Y                                                                     | Y                                  | Y           | Y                          | Y                                           | N                                     | Y                                                       | N                    | Y                         | N                   | High           |
| Chou 2021 [15]            | Y                | Y              | N                                         | Y                                                                     | N                                  | Y           | Y                          | Y                                           | N                                     | Y                                                       | Y                    | Y                         | Y                   | High           |
| Chou 2020 [16]            | Y                | N              | N                                         | NR                                                                    | N                                  | Y           | Y                          | Y                                           | N                                     | N                                                       | Y                    | Y                         | NR                  | High           |
| Citgez 2021 [17]          | N                | Y              | N                                         | Y                                                                     | N                                  | Y           | Y                          | Y                                           | NR                                    | Y                                                       | Y                    | N                         | N                   | High           |
| Collado-Mesa 2020 [18]    | Y                | Y              | Y                                         | Y                                                                     | Y                                  | Y           | Y                          | Y                                           | NR                                    | Y                                                       | N                    | N                         | NR                  | High           |
| Crisan 2021 [19]          | Y                | N              | N                                         | NR                                                                    | N                                  | Y           | Y                          | Y                                           | NR                                    | Y                                                       | Y                    | Y                         | NR                  | High           |
| Dabkeviciene 2021 [20]    | Y                | N              | N                                         | NR                                                                    | Y                                  | Y           | Y                          | Y                                           | NR                                    | Y                                                       | Y                    | Y                         | Y                   | High           |
| de Degani 2021 [21]       | Y                | Y              | Y                                         | N                                                                     | Y                                  | Y           | Y                          | Y                                           | NR                                    | Y                                                       | Y                    | N                         | Y                   | High           |
| De Vincentiis 2021 [22]   | Y                | Y              | Y                                         | Y                                                                     | Y                                  | Y           | Y                          | Y                                           | NR                                    | Y                                                       | N                    | N                         | NR                  | High           |
| DeGroff 2021[23]          | Y                | Y              | Y                                         | Y                                                                     | Y                                  | Y           | Y                          | Y                                           | N                                     | Y                                                       | N                    | Y                         | N                   | High           |
| Doshi 2021 [24]           | Y                | Y              | Y                                         | Y                                                                     | Y                                  | Y           | Y                          | Y                                           | N                                     | Y                                                       | N                    | Y                         | N                   | High           |
| Drescher 2022 [25]        | Y                | Y              | Y                                         | Y                                                                     | Y                                  | Y           | Y                          | Y                                           | Y                                     | N                                                       | Y                    | Y                         | N                   | High           |
| Eijkelboom 2021 [26]      | Y                | Y              | Y                                         | Y                                                                     | Y                                  | Y           | Y                          | Y                                           | NR                                    | Y                                                       | Y                    | Y                         | Y                   | Unclear        |
| Fedewa 2021 [27]          | Y                | Y              | Y                                         | Y                                                                     | Y                                  | Y           | Y                          | Y                                           | N                                     | Y                                                       | N                    | N                         | N                   | High           |
| Ferrara 2021 [28]         | N                | Y              | Y                                         | Y                                                                     | Y                                  | Y           | Y                          | Y                                           | NR                                    | Y                                                       | N                    | Y                         | NR                  | High           |
| Fisher-Borne 2021 [29]    | Y                | Y              | Y                                         | Y                                                                     | Y                                  | Y           | Y                          | Y                                           | N                                     | Y                                                       | N                    | N                         | N                   | High           |
| Gathani 2022 [30]         | Y                | Y              | Y                                         | Y                                                                     | Y                                  | Y           | Y                          | Y                                           | NR                                    | Y                                                       | N                    | Y                         | Y                   | High           |

|                             |   |   |   |    |   |   |    |    |   |   |   |    |         |
|-----------------------------|---|---|---|----|---|---|----|----|---|---|---|----|---------|
| Gorin 2021 [31]             | Y | Y | N | Y  | N | Y | Y  | N  | Y | N | Y | Y  | High    |
| Guyen 2021 [32]             | Y | N | N | NR | N | Y | Y  | NR | Y | Y | N | Y  | High    |
| Jidkova 2022 [33]           | Y | Y | Y | Y  | Y | Y | Y  | N  | Y | N | Y | Y  | High    |
| Kaltofen 2021 [34]          | Y | Y | N | Y  | N | Y | NR | NR | Y | N | Y | Y  | High    |
| Kang 2021 [35]              | Y | Y | Y | Y  | Y | Y | Y  | NR | N | N | Y | N  | High    |
| Kempf 2021 [36]             | Y | Y | Y | Y  | Y | Y | Y  | NR | Y | N | Y | NR | High    |
| Kidwai 2022 [37]            | Y | N | N | NR | N | Y | Y  | NR | Y | N | N | N  | High    |
| Kim 2022 [38]               | Y | Y | Y | Y  | Y | Y | Y  | Y  | Y | Y | N | N  | High    |
| Knoll 2021 [39]             | Y | Y | N | Y  | N | Y | NR | NR | Y | Y | Y | Y  | High    |
| Koczkodaj 2021 [40]         | Y | Y | Y | Y  | Y | Y | Y  | N  | Y | N | Y | N  | High    |
| Labaki 2021 [41]            | Y | Y | Y | Y  | Y | Y | Y  | NR | Y | N | N | N  | High    |
| Lacson 2021 [42]            | Y | Y | N | Y  | Y | Y | Y  | Y  | Y | Y | N | Y  | High    |
| Lang 2020 [43]              | Y | Y | N | Y  | Y | Y | Y  | NR | Y | Y | Y | Y  | High    |
| Le Bihan Benjamin 2022 [44] | Y | Y | Y | Y  | Y | Y | Y  | NR | Y | Y | Y | N  | High    |
| Linck 2022 [45]             | Y | Y | N | Y  | N | Y | Y  | NR | Y | Y | N | N  | High    |
| London 2022 [46]            | Y | Y | Y | Y  | Y | Y | Y  | NR | Y | N | Y | NR | High    |
| Losurdo 2022 [47]           | Y | N | Y | NR | Y | Y | NR | NR | N | N | N | NR | High    |
| Lowry 2021 [48]             | Y | Y | Y | Y  | Y | Y | Y  | N  | Y | Y | Y | Y  | High    |
| Miller 2021 [49]            | Y | Y | N | Y  | Y | Y | Y  | Y  | Y | Y | Y | N  | High    |
| Morais 2022 [50]            | Y | Y | N | Y  | Y | Y | Y  | Y  | Y | Y | Y | Y  | High    |
| Naidich 2020 [51]           | Y | Y | Y | Y  | Y | Y | Y  | Y  | Y | Y | Y | N  | High    |
| Norbash 2020 [52]           | N | N | Y | NR | Y | Y | Y  | N  | Y | N | Y | N  | High    |
| O'Brien 2021 [53]           | Y | N | N | NR | N | Y | NR | NR | N | N | Y | NR | High    |
| Patt 2020 [54]              | Y | Y | Y | Y  | Y | Y | Y  | NR | Y | Y | Y | NR | Unclear |
| Patt 2022 [55]              | Y | N | Y | NR | Y | Y | Y  | NR | Y | N | Y | N  | High    |
| Peacock 2021 [56]           | Y | Y | Y | Y  | Y | Y | Y  | N  | Y | N | Y | NR | High    |
| Peng 2020 [57]              | Y | Y | Y | Y  | Y | Y | Y  | NR | Y | N | Y | NR | High    |
| Purushotham 2021 [58]       | Y | Y | Y | Y  | Y | Y | Y  | NR | N | N | Y | N  | High    |
| Ribeiro 2022 [59]           | Y | Y | Y | Y  | Y | Y | N  | N  | Y | N | Y | NR | High    |
| Ruiz-Medina 2021 [60]       | Y | Y | Y | Y  | Y | Y | Y  | NR | Y | Y | Y | Y  | Unclear |
| Salem 2020 [61]             | Y | Y | N | Y  | N | Y | NR | NR | N | N | Y | NR | High    |
| Shen 2022 [62]              | Y | Y | Y | Y  | Y | Y | Y  | N  | Y | N | Y | N  | High    |
| Skovlund 2021 [63]          | Y | Y | Y | Y  | Y | Y | N  | N  | Y | N | Y | NR | High    |
| Sprague 2021 [64]           | Y | Y | Y | Y  | Y | Y | Y  | NR | Y | N | Y | N  | High    |
| Sutherland 2020 [65]        | Y | N | Y | NR | Y | Y | Y  | NR | Y | N | Y | N  | High    |
| Tachibana 2021 [66]         | Y | Y | N | Y  | Y | Y | Y  | NR | Y | Y | Y | Y  | High    |
| Tang 2022 [67]              | Y | Y | Y | Y  | Y | Y | Y  | N  | Y | Y | Y | Y  | High    |
| Tsai 2020 [68]              | Y | Y | Y | Y  | Y | Y | Y  | NR | Y | Y | N | NR | High    |
| Tsibulak 2020 [69]          | Y | Y | Y | Y  | Y | Y | NR | NR | Y | Y | Y | N  | High    |
| van Wyk 2021 [70]           | Y | Y | N | Y  | N | Y | Y  | NR | Y | Y | N | Y  | High    |

|                             |           |           |           |           |           |           |           |           |           |           |           |           |           |
|-----------------------------|-----------|-----------|-----------|-----------|-----------|-----------|-----------|-----------|-----------|-----------|-----------|-----------|-----------|
| Velazquez 2021 [71]         | Y         | Y         | N         | Y         | Y         | Y         | N         | NR        | N         | Y         | Y         | N         | High      |
| Vrdoljak 2021 [72]          | Y         | Y         | Y         | Y         | Y         | Y         | Y         | NR        | Y         | Y         | Y         | NR        | Unclear   |
| Walker 2021 [73]            | Y         | Y         | Y         | Y         | Y         | Y         | Y         | N         | Y         | N         | Y         | Y         | High      |
| Whaley 2020 [74]            | Y         | Y         | Y         | Y         | Y         | Y         | Y         | NR        | Y         | Y         | Y         | Y         | Unclear   |
| <b>Count of Y/Low</b>       | <b>71</b> | <b>62</b> | <b>50</b> | <b>61</b> | <b>58</b> | <b>74</b> | <b>65</b> | <b>8</b>  | <b>63</b> | <b>35</b> | <b>53</b> | <b>22</b> | <b>0</b>  |
| <b>Count of NR /Unclear</b> | <b>0</b>  | <b>0</b>  | <b>0</b>  | <b>12</b> | <b>0</b>  | <b>0</b>  | <b>6</b>  | <b>46</b> | <b>0</b>  | <b>0</b>  | <b>0</b>  | <b>23</b> | <b>6</b>  |
| <b>Count of N/High</b>      | <b>3</b>  | <b>12</b> | <b>24</b> | <b>1</b>  | <b>16</b> | <b>0</b>  | <b>3</b>  | <b>20</b> | <b>11</b> | <b>39</b> | <b>21</b> | <b>29</b> | <b>68</b> |

N=No, Y=Yes, NR=Not reported; Low=Low risk, Unclear=Unclear risk, High=High risk.



AppxTable F.3: Summary of positive screens or recalls

| Study, Country/Region (n=8)             | Health service setting | Pre-pandemic                                                                           | Pandemic                                                                           | Proportion of abnormal/positive screens or recall rate |                                                                                                                        |                                                            |
|-----------------------------------------|------------------------|----------------------------------------------------------------------------------------|------------------------------------------------------------------------------------|--------------------------------------------------------|------------------------------------------------------------------------------------------------------------------------|------------------------------------------------------------|
|                                         |                        | Time period                                                                            | Time period                                                                        | Services suspension/lockdown                           | Pre-pandemic vs Pandemic (data are in proportion (%) unless specified)                                                 | Absolute change in outcome                                 |
| Bakouny 2021, US [5]                    | HCS                    | Same months 2019: 02/03/2019 to 02/06/2019;<br><br>Pre-peak: 01/12/2019 to 02/03/2020. | Peak: 02/03/2020 to 02/06/2020;<br><br>After-peak: 03/06/2020 to 03/09/2020.       | NR                                                     | Peak vs Same months 2019/Pre-peak/After-Peak: 4.1% vs 1.9%-2.3%                                                        | ↓1.8%-2.2%                                                 |
| Chou 2020, Taiwan [16]                  | ASI                    | Week1, 2019 to Week 22, 2019                                                           | Week 1, 2020 to Week 22, 2020                                                      | NR                                                     | Recall rate: 5.8% vs 5.6%                                                                                              | ↓0.2%, p=0.91                                              |
| de Degani 2021, Argentina [21]          | BCSP                   | 19/03/2019 to 19/09/2019                                                               | 19/03/2020 to 19/09/2020                                                           | 19/03/2020-19/09/2020                                  | 0.60% vs 2.43%                                                                                                         | ↑1.83%, p<0.0001                                           |
| Peng 2020, Taiwan [57]                  | BCSP                   | 01/01/2019 to 31/05/2019                                                               | 01/01/2020 to 31/05/2020                                                           | No suspension                                          | 4.88% (24204/496207) vs 7.20% (25847/358771)                                                                           | ↑2.32%                                                     |
| Tsai 2020, Taiwan [68]                  | BCSP                   | 01/01/2019 to 30/04/2019                                                               | 01/01/2020 to 30/04/2020                                                           | No suspension                                          | Recall rate:<br>In hospital: 8.3% vs 8.7%;<br>Outreach: 6.6% vs 6.9%.                                                  | In hospital: ↑0.4%, p<0.001;<br>Outreach: ↑0.3%, p<0.001.  |
| Walker 2021, Canada [73]                | BCSP                   | 01/01/2019 to 31/12/2019                                                               | 01/01/2020 to 30/06/2020                                                           | Mid 03/2020-End 05/2020                                | Average risk women: 8.2-9.3% (8.8%) vs 8.5-11.3% (9.9%);<br>High risk women: 15.8-21.0% (18.6%) vs 18.4-37.3% (19.2%). | Average risk women: ↑1.1%;<br>High risk women: ↑0.6%.      |
| Number of abnormal screening mammograms |                        |                                                                                        |                                                                                    |                                                        |                                                                                                                        |                                                            |
|                                         |                        |                                                                                        |                                                                                    |                                                        | Pre-pandemic vs Pandemic (data are in frequency (N))                                                                   | Relative change in outcome                                 |
| Bentley 2021, Canada [7]                | BCSP                   | 01/01/2019 to 31/12/2019                                                               | 01/01/2020 to 31/12/2020                                                           | 18/03/2020-30/05/2020                                  | 23766 vs 16236                                                                                                         | ↓31.7%                                                     |
| Chiarelli 2021, Canada [14]             | BCSP                   | 01/01/2019 to 29/02/2020                                                               | Suspension: 01/03/2020 to 31/05/2020;<br><br>Resumption: 01/06/2020 to 31/03/2021. | 23/03/2020-26/05/2020                                  | March: 5246 vs 2690 vs 5896                                                                                            | 03/2019 vs 03/2020: ↓48.7%;<br>03/2019 vs 03/2021: ↑11.0%. |

BCSP= Breast cancer (or cancer) screening program, HCS=Healthcare (or community-based) system/network/database, ASI=A single institution or department, NR=Not reported.  
*Italics*: computed data (see Appendix C).

AppxTable F.4: Summary of screening by age

| Study, Country/Region (n=8)   | Health service setting | Pre-pandemic                 | Pandemic                                                                    | Age distribution of women having screening or number of screening mammography by age |                                                                                                                                                                                                                                                                                                                 |                                                                                                                                                                                                                                                                                                                                                                                                                                                                                                                                                                                                                                                       |
|-------------------------------|------------------------|------------------------------|-----------------------------------------------------------------------------|--------------------------------------------------------------------------------------|-----------------------------------------------------------------------------------------------------------------------------------------------------------------------------------------------------------------------------------------------------------------------------------------------------------------|-------------------------------------------------------------------------------------------------------------------------------------------------------------------------------------------------------------------------------------------------------------------------------------------------------------------------------------------------------------------------------------------------------------------------------------------------------------------------------------------------------------------------------------------------------------------------------------------------------------------------------------------------------|
|                               |                        | Time period                  | Time period                                                                 | Services suspension/ lockdown                                                        | Pre-pandemic vs Pandemic (data are frequency with proportion in the parentheses unless specified)                                                                                                                                                                                                               | Absolute change in proportion (unless specified)                                                                                                                                                                                                                                                                                                                                                                                                                                                                                                                                                                                                      |
| Amornsiripanitch 2021, US [3] | ASI                    | 17/06/2019 to 16/08/2019     | Shutdown: 17/03/2020 to 16/06/2020;<br><br>Reopen: 17/06/2020 to 16/08/2020 | 17/03/2020-16/06/2020                                                                | NR                                                                                                                                                                                                                                                                                                              | Adjusted relative risk* of failure to reschedule missed mammogram:<br>Pre vs Shutdown:<br>25th percentile: 0.59 (95% CI: 0.56-0.62);<br>50th percentile: 0.60 (95% CI: 0.57-0.63);<br>75th percentile: 0.60 (95% CI: 0.57-0.64);<br>p=0.57.<br>Pre vs Reopen:<br>25th percentile: 1.17 (95% CI: 1.12-1.23);<br>50th percentile: 1.22 (95% CI: 1.16-1.27);<br>75th percentile: 1.27 (95% CI: 1.20-1.25);<br>p=0.014.<br><br>Adjusted relative risk* of screening cancellation:<br>Pre vs Reopen:<br>25th percentile: 1.20 (95% CI: 1.16-1.24);<br>50th percentile: 1.27 (95% CI: 1.24-1.31);<br>75th percentile: 1.36 (95% CI: 1.31-1.41);<br>p<0.001. |
| Amran 2021, US [4]            | HCS                    | 01/04/2019 to 31/12/2019     | 01/04/2020 to 31/12/2020                                                    | NR                                                                                   | < 50 years: 9020 (16.2%) vs 3748 (13.9%);<br>50-64 years: 22343 (40.1%) vs 10871 (39.5%);<br>≥65 years: 24315 (43.7%) vs 12903 (46.9%)                                                                                                                                                                          | < 50 years: ↓2.3%<br>50-64 years: ↓0.6%;<br>≥65 years: ↑3.2%.                                                                                                                                                                                                                                                                                                                                                                                                                                                                                                                                                                                         |
| Chou 2020, Taiwan [16]        | ASI                    | Week1, 2019 to Week 22, 2019 | Week 1, 2020 to Week 22, 2020                                               | NR                                                                                   | Mean age (± SD) of all women: 55.45 ± 7.27 vs 55.74 ± 7.52<br><br>Women aged 45-69:<br>45-49 years: 997 (30.1%) vs 563 (31.7%);<br>50-54 years: 656 (20.1%) vs 366 (20.6%);<br>55-59 years: 592 (18.2%) vs 343 (19.3%);<br>60-64 years: 557 (17.1%) vs 284 (16.0%);<br>65-69 years: 452 (13.9%) vs 218 (12.3%). | Mean age: p=0.72.<br><br>Women aged 45-69:<br>45-49 years: ↑1.6%;<br>50-54 years: ↑0.5%;<br>55-59 years: ↑1.1% ;<br>60-64 years: ↓1.1%;<br>65-69 years: ↓1.6%;<br>p=0.32.                                                                                                                                                                                                                                                                                                                                                                                                                                                                             |
| Jidkova 2022, Belgium [33]    | BCSP                   | 01/01/2019 to 31/12/2019     | 01/01/2020 to 31/12/2020                                                    | 23/03/2020-28/06/2020                                                                | NR                                                                                                                                                                                                                                                                                                              | 50-54 years: ↓0.5% (95% CI: 0.1-1.0%);<br>55-59 years: ↓1.7% (95% CI: 1.2-2.2%);                                                                                                                                                                                                                                                                                                                                                                                                                                                                                                                                                                      |

|                          |      |                          |                                                                                                                                |                         |                                                                                                                                                                                                                                                                                                      |                                                                                                                                                                                                                                                                                                                                                                                                                                                                                                                                 |
|--------------------------|------|--------------------------|--------------------------------------------------------------------------------------------------------------------------------|-------------------------|------------------------------------------------------------------------------------------------------------------------------------------------------------------------------------------------------------------------------------------------------------------------------------------------------|---------------------------------------------------------------------------------------------------------------------------------------------------------------------------------------------------------------------------------------------------------------------------------------------------------------------------------------------------------------------------------------------------------------------------------------------------------------------------------------------------------------------------------|
|                          |      |                          |                                                                                                                                |                         |                                                                                                                                                                                                                                                                                                      | 60-64 years: ↓1.0% (95% CI: 0.6-1.5%);<br>65-69 years: ↓1.5% (95% CI: 1.0-2.0%).                                                                                                                                                                                                                                                                                                                                                                                                                                                |
| Miller 2021, US [49]     | ASI  | 16/03/2019 to 31/10/2019 | 16/03/2020 to 31/10/2020                                                                                                       | 09/03/2020-26/04/2020   | <65 years: 6164 (57.3%) vs 5274 (58.2%);<br>≥65 years: 4589 (42.7%) vs 3788 (41.8%).                                                                                                                                                                                                                 | Odds Ratio**: 1.28 (95%CI: 1.17-1.41), p<0.001                                                                                                                                                                                                                                                                                                                                                                                                                                                                                  |
| Tsai 2020, Taiwan [68]   | BCSP | 01/01/2019 to 30/04/2019 | 01/01/2020 to 30/04/2020                                                                                                       | No suspension           | 40-44 years: 1368 (0.34%) vs 1099 (0.36%);<br>45-50 years: 67502 (16.97%) vs 53274 (17.21%);<br>51-55 years: 74808 (18.81%) vs 56775 (18.34%);<br>56-60 years: 83044 (20.88%) vs 65892 (21.29%);<br>61-65 years: 85791 (21.57%) vs 65431 (21.14%);<br>66-70 years: 85226 (21.43%) vs 67091 (21.67%). | 40-44 years: ↑0.01%;<br>45-50 years: ↑0.24%;<br>51-55 years: ↓0.47%;<br>56-60 years: ↑0.41%;<br>61-65 years: ↓0.43%;<br>66-70 years: ↑0.25%.<br>p<0.001                                                                                                                                                                                                                                                                                                                                                                         |
| Velazquez 2021, US [71]  | ASI  | 01/09/2019 to 31/01/2020 | 1st shutdown: 01/02/2020 to 31/05/2020;<br><br>Reopen: 01/06/2020 to 30/11/2020;<br><br>2nd shutdown: 01/12/2020 to 31/01/2021 | NR                      | Proportion of screening mammograms completed within the screening appointments:<br>40-49 years: 77% vs 58% vs 70% vs 58%;<br>50-59 years: 77% vs 61% vs 65% vs 62%;<br>60-69 years: 83% vs 65% vs 66% vs 62%;<br>≥70 years: 77% vs 68% vs 70% vs 54%.                                                | 40-49 years:<br>- Pre vs 1st shutdown: ↓19%, p<0.05;<br>- Pre vs Reopen: ↓7%, p>0.05;<br>- Pre vs 2nd shutdown: ↓19%, p<0.05;<br>50-59 years:<br>- Pre vs 1st shutdown: ↓16%, p<0.05;<br>- Pre vs Reopen: ↓12%, p<0.05;<br>- Pre vs 2nd shutdown: ↓15%, p<0.05;<br>60-69 years:<br>- Pre vs 1st shutdown: ↓18%, p<0.05;<br>- Pre vs Reopen: ↓17%, p<0.05;<br>- Pre vs 2nd shutdown: ↓21%, p<0.05;<br>≥70 years:<br>- Pre vs 1st shutdown: ↓9%, p<0.05;<br>- Pre vs Reopen: ↓7%, p<0.05;<br>- Pre vs 2nd shutdown: ↓23%, p<0.05; |
| Walker 2021, Canada [73] | BCSP | 01/03/2019 to 31/12/2019 | 01/03/2020 to 31/12/2020                                                                                                       | Mid 03/2020-End 05/2020 | 30-39 years: 2488 (0.4%) vs 2022 (0.7%);<br>40-49 years: 4265 (0.7%) vs 3756 (1.3%);<br>50-59 years: 268114 (44.3%) vs 125028 (44.0%);<br>60-69 years: 246329 (40.7%) vs 114685 (40.3%);<br>70-74 years: 84693 (14.0%) vs 38751 (13.6%).                                                             | 30-39 years: ↑0.3%;<br>40-49 years: ↑0.6%;<br>50-59 years: ↓0.3%;<br>60-69 years: ↓0.4%;<br>70-74 years: ↓0.4%.                                                                                                                                                                                                                                                                                                                                                                                                                 |

BCSP= Breast cancer (or cancer) screening program, HCS=Healthcare (or community-based) system/network/database, ASI=A single institution or department, NR=Not reported, CI=Confidence interval.

Light grey cells: plot-extracted data (see Appendix C); *Italics*: computed data (see Appendix C).

\* Adjusted for insurance provider, race, chronic disease, and location.

\*\* Controlled for race, ethnicity, breast density, insurance status, imaging site type, called back from screening in 2019, history of breast cancer, requires interpreter, travel time to imaging centre, median household income, and percent living below poverty level.

AppxTable F.5: Summary of screening by ethnicity or race

| Study, Country/Region (n=10)  | Health service setting | Pre-pandemic Time period           | Pandemic Time period                                                                                                                      | Services suspension/lockdown | Screening or cancellation rate by ethnicity or race                                                                                                                                                                                                                                                                                                                                                                                                       |                                                                                                                                                                                                                                                                                                                                                                                                 |
|-------------------------------|------------------------|------------------------------------|-------------------------------------------------------------------------------------------------------------------------------------------|------------------------------|-----------------------------------------------------------------------------------------------------------------------------------------------------------------------------------------------------------------------------------------------------------------------------------------------------------------------------------------------------------------------------------------------------------------------------------------------------------|-------------------------------------------------------------------------------------------------------------------------------------------------------------------------------------------------------------------------------------------------------------------------------------------------------------------------------------------------------------------------------------------------|
|                               |                        |                                    |                                                                                                                                           |                              | Pre-pandemic vs Pandemic (data are in proportion (%)) unless specified)                                                                                                                                                                                                                                                                                                                                                                                   | Absolute change in outcome (unless specified)                                                                                                                                                                                                                                                                                                                                                   |
| Amornsiripanitch 2021, US [3] | ASI                    | 17/06/2019 to 16/08/2019           | 17/06/2020 to 16/08/2020                                                                                                                  | NR                           | Cancellation rate by race:<br>Non-white: 40% vs 53%;<br>White: 36% vs 44%.                                                                                                                                                                                                                                                                                                                                                                                | Adjusted relative risk*<br>Non-white: 1.34 (95%CI: 1.27-1.41);<br>White: 1.25 (95%CI: 1.21-1.29);<br>p=0.025.                                                                                                                                                                                                                                                                                   |
| Fedewa 2021, US [27]          | HCS                    | 01/07/2019 to 31/07/2019           | 01/07/2020 to 31/07/2020                                                                                                                  | NR                           | Screening rate by black people distribution:<br>Low: 52.5% vs 49.9%;<br>Medium: 53.9% vs 49.7%;<br>High: 55.3% vs 48.9%.<br><br>Screening rate by Hispanic people distribution:<br>Low: 45.1% vs 41.5%;<br>Medium: 52.2% vs 47.7%;<br>High: 57.9% vs 54.1%                                                                                                                                                                                                | Screening Rate Ratio (95%CI) by black people distribution:<br>Low: 0.95 (0.94-0.97);<br>Medium 0.92 (0.91-0.93);<br>High: 0.88 (0.87-0.90).<br><br>Screening Rate Ratio (95%CI) by Hispanic people distribution:<br>Low: 0.92 (0.90-0.94);<br>Medium 0.91 (0.90-0.92);<br>High: 0.93 (0.92-0.94).                                                                                               |
| Labaki 2021, US [41]          | HCS                    | Pre-peak: 01/12/2019 to 02/03/2020 | 1st peak: 02/03/2020 to 02/06/2020;<br><br>Period between two peaks: 03/06/2020 to 03/09/2020;<br><br>2nd peak: 04/09/2020 to 05/12/2020. | NR                           | Proportion of patients undergoing mammography:<br>Pre-peak vs 1st Peak:<br>Non-Hispanic white: 79.0% vs 79.7%;<br>Non-Hispanic black: 6.3% vs 6.1%.<br><br>Pre-peak vs Period between two peaks:<br>Non-Hispanic white: 79.0% vs 83.2%;<br>Non-Hispanic black: 6.3% vs 5.2%;<br>Hispanic/Latino: 3.3% vs 2.4%.<br><br>Pre-peak vs 2nd Peak:<br>Non-Hispanic white: 79.0% vs 82.0%;<br>Non-Hispanic black: 6.3% vs 5.3%;<br>Hispanic/Latino: 3.3% vs 2.6%. | Pre-peak vs 1st Peak:<br>Non-Hispanic white: ↑0.7%;<br>Non-Hispanic black: ↓0.2%.<br><br>Pre-peak vs Period between two peaks:<br>Non-Hispanic white: ↑4.2%, p<0.001;<br>Non-Hispanic black: ↓1.1%, p<0.001;<br>Hispanic/Latino: ↓0.9%, p<0.001.<br><br>Pre-peak vs 2nd Peak:<br>Non-Hispanic white: ↑3.0%, p<0.001;<br>Non-Hispanic black: ↓1.0%, p<0.001;<br>Hispanic/Latino: ↓0.7%, p<0.001. |
| Patt 2022, US [55]            | HCS                    | 01/03/2019 to 30/09/2019           | 01/03/2020 to 30/09/2020                                                                                                                  | NR                           | NR                                                                                                                                                                                                                                                                                                                                                                                                                                                        | Monthly change in screening rate:<br>White: ↓6.2% (Apr) - ↑0.7% (Sep), coverage in Aug at 0.0%;<br>Black/African American: ↓5.7% (Apr) - ↑0.6% (Sep),                                                                                                                                                                                                                                           |

|                                                                                            |     |                           |                                                                                                                                |    |                                                                                                                                                                                                                                           |                                                                                                                                                                                                                                                                                                                                                                                                                                                                                                                                                                                                        |
|--------------------------------------------------------------------------------------------|-----|---------------------------|--------------------------------------------------------------------------------------------------------------------------------|----|-------------------------------------------------------------------------------------------------------------------------------------------------------------------------------------------------------------------------------------------|--------------------------------------------------------------------------------------------------------------------------------------------------------------------------------------------------------------------------------------------------------------------------------------------------------------------------------------------------------------------------------------------------------------------------------------------------------------------------------------------------------------------------------------------------------------------------------------------------------|
|                                                                                            |     |                           |                                                                                                                                |    |                                                                                                                                                                                                                                           | coverage in Jun at 0.0%;<br>Asian/Native Hawaiian/Pacific Islander: ↓4.5% (Apr) - ↓0.3% (Sep), coverage in Sept at ↓0.3%;<br>Hispanic/Latino: ↓3.5% (May) - ↓0.2% (Sep), coverage in Sept at ↓0.2%;<br>American Indian/Alaska Native: ↓2.5% (May) - ↑0.3% (Sep), coverage in Sept at 0.3%.                                                                                                                                                                                                                                                                                                             |
| Velazquez 2021, US [71]                                                                    | ASI | 01/09/2019 to 31/01/2020  | 1st shutdown: 01/02/2020 to 31/05/2020;<br><br>Reopen: 01/06/2020 to 30/11/2020;<br><br>2nd shutdown: 01/12/2020 to 31/01/2021 | NR | Proportion of completed screening appointments by race/ethnicity:<br>White: 71% vs 62% vs 65% vs 61%;<br>Asian: 87% vs 73% vs 74% vs 72%;<br>Latinx: 81% vs 64% vs 73% vs 61%;<br>Black/African American women: 59% vs 45% vs 43% vs 38%. | Proportion of completed screening appointments by race/ethnicity:<br>White:<br>- Pre vs 1st shutdown: ↓9%, p<0.05;<br>- Pre vs Reopen: ↓6%, p>0.05;<br>- Pre vs 2nd shutdown: ↓10%, p<0.05;<br>Asian:<br>- Pre vs 1st shutdown: ↓14%, p<0.05;<br>- Pre vs Reopen: ↓13%, p<0.05;<br>- Pre vs 2nd shutdown: ↓15%, p<0.05;<br>Latinx:<br>- Pre vs 1st shutdown: ↓17%, p<0.05;<br>- Pre vs Reopen: ↓8%, p<0.05;<br>- Pre vs 2nd shutdown: ↓20%, p<0.05;<br>Black/African American women:<br>- Pre vs 1st shutdown: ↓14%, p<0.05;<br>- Pre vs Reopen: ↓16%, p<0.05;<br>- Pre vs 2nd shutdown: ↓21%, p<0.05. |
| Whaley 2020, US [74]                                                                       | HIC | 01/03/2019 to 30/04/2019. | 01/03/2020 to 30/04/2020.                                                                                                      | NR | NR                                                                                                                                                                                                                                        | Adjusted absolute change** of utilisation rate of mammogram by race in March/April:<br>≤20% non-white: ↓249.2 per 10000 women, p<0.01.<br>79%-21% non-white: ↓242.8 per 10000 women, p>0.05.<br>≥80% non-white: ↓243.7 per 10000 women, p>0.05.                                                                                                                                                                                                                                                                                                                                                        |
| <b>Number of women having screening by ethnicity or race</b>                               |     |                           |                                                                                                                                |    |                                                                                                                                                                                                                                           |                                                                                                                                                                                                                                                                                                                                                                                                                                                                                                                                                                                                        |
| <b>Pre-pandemic vs Pandemic (data are in frequency (N) unless shown as proportion (%))</b> |     |                           |                                                                                                                                |    | <b>Relative change in outcome</b>                                                                                                                                                                                                         |                                                                                                                                                                                                                                                                                                                                                                                                                                                                                                                                                                                                        |
| Amran 2021, US [4]                                                                         | HCS | 01/04/2019 to 31/12/2019  | 01/04/2020 to 31/12/2020                                                                                                       | NR | Hispanic: 1727 vs 619;<br>American Indian/Alaska Native: 215 vs 84;<br>Mixed race: 1892 vs 828;<br>Native Hawaiian/Pacific Islander: 365 vs 166;<br>Asian: 2779 vs 1265;<br>Black: 2320 vs 1069;<br>White: 45572 vs 23163.                | Hispanic: ↓64.2%;<br>American Indian/Alaska Native: ↓60.9%;<br>Mixed race: ↓56.2%;<br>Native Hawaiian/Pacific Islander: ↓54.5%;<br>Asian: ↓54.5%;<br>Black: ↓53.9%;                                                                                                                                                                                                                                                                                                                                                                                                                                    |

|                       |      |                                    |                          |                       |                                                                                                                                        |                                                                                                                                                                                                                                                                                                                                              |
|-----------------------|------|------------------------------------|--------------------------|-----------------------|----------------------------------------------------------------------------------------------------------------------------------------|----------------------------------------------------------------------------------------------------------------------------------------------------------------------------------------------------------------------------------------------------------------------------------------------------------------------------------------------|
|                       |      |                                    |                          |                       |                                                                                                                                        | White: ↓49.2%;<br>p<0.001                                                                                                                                                                                                                                                                                                                    |
| DeGroff 2021, US [23] | BCSP | 01/01/2015-2019 to 30/06/2015-2019 | 01/01/2020 to 30/06/2020 | NR                    | NR                                                                                                                                     | In April:<br>-White: ↓87%;<br>-Black: ↓90%;<br>-Asian/Pacific Islander: ↓97%;<br>-American Indian/Alaskan Native: ↓98%;<br>-Multiracial: ↓94%;<br>-Hispanic: ↓84%.<br><br>In June:<br>-White: ↓40%;<br>-Black: ↓44%;<br>-Asian/Pacific Islander: ↓65%;<br>-American Indian/ Alaskan Native: ↓70%;<br>-Multiracial: ↓57%;<br>-Hispanic: ↓32%. |
| Miller 2021, US [49]  | ASI  | 16/03/2019 to 31/10/2019           | 16/03/2020 to 31/10/2020 | 09/03/2020-26/04/2020 | Race:<br>White: 77.8% vs 79.8%;<br>Other: 22.2% vs 20.2%.<br><br>Ethnicity:<br>Non-Hispanic: 93.2% vs 95.6%;<br>Hispanic: 3.0% vs 2.8% | Race:<br>Odds Ratio***: 0.90 (95%CI: 0.80-1.01), p=0.067.<br><br>Ethnicity:<br>Odds Ratio**: 0.78 (95%CI: 0.55-1.11), p=0.171.                                                                                                                                                                                                               |
| Sprague 2021, US [64] | CIR  | 01/01/2019 to 31/07/2019           | 01/01/2020 to 31/07/2020 | NR                    | NR                                                                                                                                     | In July:<br>White: ↓7.1% (95% CI****: -17.1% to 4.0%);<br>Black: ↓3.3% (95% CI****: -11.9% to 6.1%);<br>Hispanic: ↓27.3% (95% CI****: -6.4% to -43.5%);<br>Asian: ↓48.7% (95% CI****: -33.8% to -60.3%);                                                                                                                                     |

BCSP= Breast cancer (or cancer) screening program, HCS=Healthcare (or community-based) system/network/database, ASI=A single institution or department, CIR=Cancer or imaging registry, HIC=Health insurance claims, NR=Not reported, CI=Confidence interval.

Light grey cells: plot-extracted data (see Appendix C); *Italics*: computed data (see Appendix C).

\* Adjusted for age, insurance provider, chronic disease, and location.

\*\* Controls for the age categories, state, year, and month.

\*\*\* Controlled for age, breast density, insurance status, imaging site type, called back from screening in 2019, history of breast cancer, requires interpreter, travel time to imaging centre, median household income, and percent living below poverty level.

\*\*\*\* Adjusted for imaging registry site.

AppxTable F.6: Summary of diagnosis by detection mode

| Study,<br>Country/Region<br>(n=9) | Health<br>service<br>setting | Pre-pandemic                                                                            |                                                                                                                       | Pandemic                            |                                                                                                                                                                     | Distribution of detection mode                                                                                                                                                                                                                                                           |  |
|-----------------------------------|------------------------------|-----------------------------------------------------------------------------------------|-----------------------------------------------------------------------------------------------------------------------|-------------------------------------|---------------------------------------------------------------------------------------------------------------------------------------------------------------------|------------------------------------------------------------------------------------------------------------------------------------------------------------------------------------------------------------------------------------------------------------------------------------------|--|
|                                   |                              | Time period                                                                             | Time period                                                                                                           | Services<br>suspension/<br>lockdown | Pre-pandemic vs Pandemic (data are in<br>proportions (%) or frequency with<br>proportion in the parentheses)                                                        | Absolute change in proportion                                                                                                                                                                                                                                                            |  |
| Bonadio 2021,<br>Brazil [10]      | ASI                          | 01/09/2019 to<br>31/01/2020                                                             | 01/09/2020 to<br>31/01/2021                                                                                           | NR                                  | Screening: 25.5% vs 13.7%;<br>Symptomatic: 74.5% vs 86.3%.                                                                                                          | Screening: ↓11.8%,<br>Symptomatic: ↑11.8%;<br>p<0.001.                                                                                                                                                                                                                                   |  |
| Borsky 2022,<br>UK [11]           | ASI                          | 01/05/2019 to<br>31/10/2019                                                             | 01/05/2020 to<br>31/10/2020                                                                                           | 01/05/2020-<br>31/07/2020           | Screening: 121 (43.8%) vs 15 (9.2%);<br>Referral (for symptomatic): 155 (56.2%) vs 148<br>(90.8%).                                                                  | Screening: ↓34.6%.<br>Referral (for symptomatic): ↑34.6%;<br>p<0.0001.                                                                                                                                                                                                                   |  |
| Citgez 2021,<br>Turkey [17]       | ASI                          | Pre-peak:<br>01/12/2019 to<br>29/02/2020                                                | Peak: 01/03/2020<br>to 31/05/2020;<br><br>After-peak:<br>01/06/2020 to<br>31/08/2020.                                 | NR                                  | Screening: 20 (27.77%) vs 2 (9.09%) vs 3<br>(6.52%);<br>Symptomatic: 52 (72.22%) vs 20 (90.9%) vs 43<br>(93.47%).                                                   | <i>Pre-peak vs Peak:</i><br><i>Screening:</i> ↓18.68%;<br><i>Symptomatic:</i> ↑18.68%.<br><br><i>Pre-peak vs After-peak:</i><br><i>Screening:</i> ↓21.25%;<br><i>Symptomatic:</i> ↑21.25%.<br><br><i>Peak vs After-peak:</i><br><i>Screening:</i> ↓2.57%;<br><i>Symptomatic:</i> ↑2.57%. |  |
| Guyen 2021,<br>Turkey [32]        | ASI                          | 01/03/2019 to<br>31/12/2019                                                             | 01/03/2020 to<br>31/12/2020                                                                                           | No lockdown                         | Screening:<br>No: 106 (47.7%) vs 72 (61.0%);<br>Yes: 116 (52.3%) vs 46 (39.0%).<br>Symptomatic:<br>No: 44 (20.1%) vs 22 (19.0%);<br>Yes: 175 (79.9%) vs 94 (81.0%). | <i>Screening:</i><br><i>No:</i> ↑13.3%<br><i>Yes:</i> ↓13.3%.<br><i>Symptomatic:</i><br><i>No:</i> ↓1.1%<br><i>Yes:</i> ↑1.1%.                                                                                                                                                           |  |
| Linck 2022,<br>France [45]        | ASI                          | Reference:<br>average 36<br>working days<br>between<br>27/01/2019<br>and<br>01/07/2019. | Pre-lockdown:<br>27/01/2020 to<br>16/03/2020;<br><br>Lockdown:<br>17/03/2020 to<br>05/05/2020;<br><br>After-lockdown: | 17/03/2020-<br>11/05/2020           | Proportion of symptomatic cancers: 57% vs<br>47% vs 75% vs 86%                                                                                                      | Reference vs Lockdown: ↑18%, p=0.07;<br><br>Reference vs Post-lockdown: ↑29%, p<0.0001;<br><br>Pre-lockdown vs Lockdown: ↑28%, p=0.02;<br><br>Pre-lockdown vs Post-lockdown: ↑39%, p<0.0001.                                                                                             |  |

|                                                             |     |                                                                                       |                                                                                                                                          |                                     |                                                                                                                                                                                                       |                                                                                                                      |
|-------------------------------------------------------------|-----|---------------------------------------------------------------------------------------|------------------------------------------------------------------------------------------------------------------------------------------|-------------------------------------|-------------------------------------------------------------------------------------------------------------------------------------------------------------------------------------------------------|----------------------------------------------------------------------------------------------------------------------|
|                                                             |     |                                                                                       | 11/05/2020 to 01/07/2020.                                                                                                                |                                     |                                                                                                                                                                                                       |                                                                                                                      |
| Tachibana 2021, Brazil [66]                                 | ASI | Comparison 1: 24/03/2019 to 21/06/2019;<br><br>Comparison 2: 22/06/2019 to 31/12/2019 | Comparison 1 (during social isolation): 24/03/2020 to 21/06/2020;<br><br>Comparison 2 (after social isolation): 22/06/2020 to 31/12/2020 | 26/03/2020-21/06/2020               | Proportion of breast cancer in patients presenting symptoms or elevated risk:<br>Comparison 1 (during social isolation): 55.6% vs 88.9%;<br><br>Comparison 2 (after social isolation): 61.2% vs 60.0% | Comparison 1 (during social isolation): ↑33.3%, p=0.016;<br><br>Comparison 2 (after social isolation): ↓1.2% p=0.857 |
| Tang 2022, US [67]                                          | HCS | 17/03/2019 to 17/05/2019                                                              | 17/03/2020 to 17/05/2020                                                                                                                 | 17/03/2020-17/05/2020               | Screening: 440 (63%) vs 54(22%);<br>Symptomatic: 263 (37%) vs 193 (78%).                                                                                                                              | Screening: ↓41%,<br>Symptomatic: ↑41%;<br>p<0.001.                                                                   |
| <b>Number of diagnoses by detection mode</b>                |     |                                                                                       |                                                                                                                                          |                                     |                                                                                                                                                                                                       |                                                                                                                      |
| <b>Pre-pandemic vs Pandemic (data are in frequency (N))</b> |     |                                                                                       |                                                                                                                                          | <b>Relative change in outcome</b>   |                                                                                                                                                                                                       |                                                                                                                      |
| Eijkelboom 2021*, Netherlands [26]                          | CIR | Week 9, 2018-2019 to Week 35, 2018-2019                                               | Week 9, 2020 to Week 35, 2020                                                                                                            | 16/03/2020-05/07/2020 (weeks 12-27) | Screen-detected tumours: 3030 vs 1034.<br>Non-screen-detected tumours: 2722 vs 2591.                                                                                                                  | Screen-detected tumours: ↓67%.<br>Non-screen-detected tumours: ↓7%.                                                  |
| Lowry 2021*, US [48]                                        | CIR | 01/03/2019 to 30/09/2019                                                              | 01/03/2020 to 30/09/2020                                                                                                                 | NR                                  | Screen-detected tumours: 1169 vs 722.<br>Symptomatic tumours: 965 vs 895.                                                                                                                             | Screen-detected cancers: ↓38% (95% CI: 31-45%), p<0.001.<br>Symptomatic cancers: ↓7% (95% CI: -19% to 6%), p=0.27.   |

HCS=Healthcare (or community-based) system/network/database, ASI=A single institution or department, CIR=Cancer or imaging registry, NR=Not reported, CI=Confidence interval.

*Italics*: computed data (see Appendix C).

\* Study sample also contains in situ tumour, and/or benign tumour cases.



AppxTable F.7: Summary of stage distribution

| Study, Country/Region (n=16) | Health service setting | Pre-pandemic             |                          | Pandemic                      | Stage at diagnosis or stage at presentation (Numbering/TNM stage or Stage group)                                                                                                                                                                                                                                                                                                                                                                                                                                                                                                                                                                                                               |                                                                                                                                                                                                                                                                                                                              |
|------------------------------|------------------------|--------------------------|--------------------------|-------------------------------|------------------------------------------------------------------------------------------------------------------------------------------------------------------------------------------------------------------------------------------------------------------------------------------------------------------------------------------------------------------------------------------------------------------------------------------------------------------------------------------------------------------------------------------------------------------------------------------------------------------------------------------------------------------------------------------------|------------------------------------------------------------------------------------------------------------------------------------------------------------------------------------------------------------------------------------------------------------------------------------------------------------------------------|
|                              |                        | Time period              | Time period              | Services suspension/ lockdown | Pre-pandemic vs Pandemic (data are frequency with proportion in the parentheses unless specified)                                                                                                                                                                                                                                                                                                                                                                                                                                                                                                                                                                                              | Absolute change in proportion                                                                                                                                                                                                                                                                                                |
| Bonadio 2021, Brazil [10]    | ASI                    | 01/09/2019 to 31/01/2020 | 01/09/2020 to 31/01/2021 | NR                            | Stage I: 94 (29.6%) vs 25 (9.3%);<br>Stage II: 198 (43.3%) vs 101 (37.7%);<br>Stage III: 106 (23.2%) vs 100 (37.3%);<br>Stage IV: 59 (12.9%) vs 42 (15.7%)                                                                                                                                                                                                                                                                                                                                                                                                                                                                                                                                     | Stage I: ↓20.3%;<br>Stage II: ↓5.6%;<br>Stage III: ↑14.1%;<br>Stage IV: ↑2.8%;<br>p<0.001                                                                                                                                                                                                                                    |
| Borsky 2022, UK [11]         | ASI                    | 01/05/2019 to 31/10/2019 | 01/05/2020 to 31/10/2020 | 01/05/2020-31/07/2020         | For all diagnoses:<br>Stage 0: 39 vs 10;<br>Stage 1a: 111 vs 45;<br>Stage 1b: 21 vs 4;<br>Stage 2a: 44 vs 43;<br>Stage 2b: 30 vs 29;<br>Stage 3a: 16 vs 16;<br>Stage 3b: 3 vs 0;<br>Stage 3c: 2 vs 3;<br>Stage 4: 10 vs 13.<br>Node positive: 65 (23.6%) vs 59 (36.2%).<br>Metastatic: 8 (2.9%) vs 13 (8%).<br><br>For diagnoses through referral:<br>Stage 0: 16 vs 9;<br>Stage 1a: 51 vs 39;<br>Stage 1b: 11 vs 4;<br>Stage 2a: 32 vs 39;<br>Stage 2b: 22 vs 27;<br>Stage 3a: 11 vs 15;<br>Stage 3b: 3 vs 0;<br>Stage 3c: 1 vs 3;<br>Stage 4: 8 vs 12.<br><br>For diagnosis through screen-detection:<br>Stage 0: 23 vs 1;<br>Stage 1a: 60 vs 6;<br>Stage 1b: 10 vs 0;<br>Stage 2a: 12 vs 4; | For all diagnoses: median stage at detection, 1a → 2a, p<0.0001.<br><br>Node positive: ↑12.6%, p=0.0063.<br>Metastatic: ↑5.1%, p=0.0295.<br><br>For diagnoses through referral: median stage at detection, 1b → 2a, p = 0.0184.<br><br>For diagnoses through screen-detection: median stage at detection: 1a → 2a, p=0.0445. |

|                                          |     |                                                |                                                                                          |                                                |                                                                                                                                                                                                                                                                                                                                                                                                                                                                                                                                                                                                                                                                                                                                                                                                                                                                   |                                                                                                                                                                                                                                                                                                                                                                                                                                                                         |
|------------------------------------------|-----|------------------------------------------------|------------------------------------------------------------------------------------------|------------------------------------------------|-------------------------------------------------------------------------------------------------------------------------------------------------------------------------------------------------------------------------------------------------------------------------------------------------------------------------------------------------------------------------------------------------------------------------------------------------------------------------------------------------------------------------------------------------------------------------------------------------------------------------------------------------------------------------------------------------------------------------------------------------------------------------------------------------------------------------------------------------------------------|-------------------------------------------------------------------------------------------------------------------------------------------------------------------------------------------------------------------------------------------------------------------------------------------------------------------------------------------------------------------------------------------------------------------------------------------------------------------------|
|                                          |     |                                                |                                                                                          |                                                | Stage 2b: 8 vs 2;<br>Stage 3a: 5 vs 1;<br>Stage 3b: 0 vs 0;<br>Stage 3c: 1 vs 0;<br>Stage 4: 2 vs 1.                                                                                                                                                                                                                                                                                                                                                                                                                                                                                                                                                                                                                                                                                                                                                              |                                                                                                                                                                                                                                                                                                                                                                                                                                                                         |
| Chou 2021*,<br>Taiwan [15]               | ASI | 21/01/2019 to<br>31/07/2019                    | 21/01/2020 to<br>31/07/2020                                                              | NR                                             | Stages 0-1: 71% vs 49%;<br>Stages 2-4: 29% vs 51%.                                                                                                                                                                                                                                                                                                                                                                                                                                                                                                                                                                                                                                                                                                                                                                                                                | Stages 0-1: ↓22%;<br>Stages 2-4: ↑22%.<br>p<0.001                                                                                                                                                                                                                                                                                                                                                                                                                       |
| Citgez 2021,<br>Turkey [17]              | ASI | Pre-peak:<br>01/12/2019 to<br>29/02/2020       | Peak:<br>01/03/2020 to<br>31/05/2020;<br><br>After-peak:<br>01/06/2020 to<br>31/08/2020. | NR                                             | Stage 1: 20 (27.77%) vs 5 (22.72%) vs 4 (8.69%);<br>Stage 2: 32 (44.44%) vs 8 (36.36%) vs 21 (45.65%);<br>Stage 3: 16 (22.22%) vs 7 (31.81%) vs 16 (34.78%);<br>Stage 4: 4 (5.55%) vs 2 (9.09%) vs 5 (10.86%).                                                                                                                                                                                                                                                                                                                                                                                                                                                                                                                                                                                                                                                    | Stage 1:<br>Pre-peak vs Peak: ↓5.05%;<br>Pre-peak vs After-peak: ↓19.08%;<br>Stage 2:<br>Pre-peak vs Peak: ↓8.08%;<br>Pre-peak vs After-peak: ↑1.21%;<br>Stage 3:<br>Pre-peak vs Peak: ↑9.59%;<br>Pre-peak vs After-peak: ↑12.56%;<br>Stage 4:<br>Pre-peak vs Peak: ↑3.54%;<br>Pre-peak vs After-peak: ↑5.31%.                                                                                                                                                          |
| Eijkelboom<br>2021*,<br>Netherlands [26] | CIR | Week 2, 2018-<br>2019 to Week<br>35, 2018-2019 | Week 2, 2020<br>to Week 35,<br>2020                                                      | 16/03/2020-<br>05/07/2020<br>(weeks 12-<br>27) | For all tumours:<br>DCIS: 1200 (16.47%) vs 764 (14.40%);<br>Stage I: 3514 (48.24%) vs 2343 (44.16%);<br>Stage II: 1863 (25.57%) vs 1567 (29.53%);<br>Stage III: 327 (4.49%) vs 289 (5.45%);<br>Stage IV: 306 (4.20%) vs 301 (5.67%);<br>Unknown: 75 (1.03%) vs 42 (0.79%).<br><br>For screen-detected tumours:<br>DCIS: 853 (22.16%) vs 446 (23.76%);<br>Stage I: 2213 (57.50%) vs 1049 (55.89%);<br>Stage II: 674 (17.51%) vs 334 (17.79%);<br>Stage III: 48 (1.25%) vs 23 (1.23%);<br>Stage IV: 21 (0.55%) vs 13 (0.69%);<br>Unknown: 40 (1.04%) vs 12 (0.64%).<br><br>For non-screen-detected tumours:<br>DCIS: 350 (10.14%) vs 318 (9.43%);<br>Stage I: 1304 (37.78%) vs 1289 (38.24%);<br>Stage II: 1191 (34.50%) vs 1196 (35.48%);<br>Stage III: 280 (8.11%) vs 254 (7.53%);<br>Stage IV: 288 (8.34%) vs 285 (8.45%);<br>Unknown: 39 (1.13%) vs 29 (0.86%). | For all tumours:<br>DCIS: ↓2.07%;<br>Stage I: ↓4.08%;<br>Stage II: ↑3.96%;<br>Stage III: ↑0.96%;<br>Stage IV: ↑1.47%;<br>Unknown: ↓0.24%.<br><br>For screen-detected tumours:<br>DCIS: ↑1.60%;<br>Stage I: ↓1.61%;<br>Stage II: ↑0.28%;<br>Stage III: ↓0.02%;<br>Stage IV: ↑0.14%;<br>Unknown: ↓0.40%.<br><br>For non-screen-detected tumours:<br>DCIS: ↓0.71%;<br>Stage I: ↑0.46%;<br>Stage II: ↑0.98%;<br>Stage III: ↓0.58%;<br>Stage IV: ↑0.11%;<br>Unknown: ↓0.27%. |

|                              |     |                                                                                                                      |                                                                                                                    |                                               |                                                                                                                                                                                                                                                                                                                                                                                                                                                                                                                                                                                                                                                                                                       |                                                                                                                                                                                                                                                                                                                                                                                                                            |
|------------------------------|-----|----------------------------------------------------------------------------------------------------------------------|--------------------------------------------------------------------------------------------------------------------|-----------------------------------------------|-------------------------------------------------------------------------------------------------------------------------------------------------------------------------------------------------------------------------------------------------------------------------------------------------------------------------------------------------------------------------------------------------------------------------------------------------------------------------------------------------------------------------------------------------------------------------------------------------------------------------------------------------------------------------------------------------------|----------------------------------------------------------------------------------------------------------------------------------------------------------------------------------------------------------------------------------------------------------------------------------------------------------------------------------------------------------------------------------------------------------------------------|
|                              |     |                                                                                                                      |                                                                                                                    |                                               |                                                                                                                                                                                                                                                                                                                                                                                                                                                                                                                                                                                                                                                                                                       |                                                                                                                                                                                                                                                                                                                                                                                                                            |
| Guven 2021, Turkey [32]      | ASI | 01/03/2019 to 31/12/2019                                                                                             | 01/03/2020 to 31/12/2020                                                                                           | No lockdown                                   | Stage I: 45 (20.7%) vs 17 (14.3%);<br>Stage II: 110 (50.5%) vs 47 (39.5%);<br>Stage III: 42 (19.2%) vs 30 (25.2%);<br>Stage IV: 21 (9.6%) vs 25 (21%).                                                                                                                                                                                                                                                                                                                                                                                                                                                                                                                                                | Stage I: ↓6.4%;<br>Stage II: ↓11.0%;<br>Stage III: ↑6.0%;<br>Stage IV: ↑11.4%.                                                                                                                                                                                                                                                                                                                                             |
| Kaltofen 2021*, Germany [34] | ASI | 01/01/2019 to 30/06/2019                                                                                             | 01/01/2020 to 30/06/2020                                                                                           | 22/03/2020-05/05/2020                         | Tis: 12 (7%) vs 11 (7%);<br>T1: 53 (31%) vs 46 (31%);<br>T2-4: 45 (27%) vs 30 (20%);<br>N+: 41 (24%) vs 46 (31%);<br>M1: 19 (11%) vs 17 (11%).                                                                                                                                                                                                                                                                                                                                                                                                                                                                                                                                                        | Tis: 0%;<br>T1: ↓1%;<br>T2-T4: ↓7%;<br>N+: ↑7%;<br>M1: 0%.                                                                                                                                                                                                                                                                                                                                                                 |
| Kang 2021*, Korea [35]       | HCS | Comparison 1: 01/02/2019 to 30/04/2019;<br><br>Comparison 2: 01/05/2019 to 31/07/2019                                | Comparison 1 (peak): 01/02/2020 to 30/04/2020;<br><br>Comparison 2 (after-peak): 01/05/2020 to 31/07/2020          | NR                                            | Comparison 1 (peak):<br>Stage 0: 88 (17.4%) vs 98 (22.0%);<br>Stage I: 171 (33.9%) vs 123 (27.6%);<br>Stage IIA: 109 (21.6%) vs 120 (26.9%);<br>Stage IIB: 84 (16.4%) vs 61 (13.5%);<br>Stage IIIA: 21 (4.2%) vs 14 (3.1%);<br>Stage IIIB: 2 (0.4%) vs 4 (0.9%);<br>Stage IIIC: 8 (1.6%) vs 9 (2.0%);<br>Stage IV: 22 (4.6%) vs 18 (4.0%).<br><br>Comparison 2 (after-peak):<br>Stage 0: 90 (16.7%) vs 144 (25.0%);<br>Stage I: 172 (31.9%) vs 127 (22.1%);<br>Stage IIA: 139 (25.8%) vs 132 (22.9%);<br>Stage IIB: 71 (13.2%) vs 99 (17.0%);<br>Stage IIIA: 25 (4.6%) vs 27 (4.7%);<br>Stage IIIB: 4 (0.7%) vs 3 (0.5%);<br>Stage IIIC: 14 (2.6%) vs 13 (2.3%);<br>Stage IV: 24 (4.5%) vs 31 (5.6%). | Comparison 1 (peak):<br>Stage 0: ↑4.6%;<br>Stage I: ↓6.3%;<br>Stage IIA: ↑5.3%;<br>Stage IIB: ↓2.9%;<br>Stage IIIA: ↓1.1%;<br>Stage IIIB: ↑0.5%;<br>Stage IIIC: ↑0.4%;<br>Stage IV: ↓0.6%;<br>p=0.115.<br><br>Comparison 2 (after-peak):<br>Stage 0: ↑8.3%;<br>Stage I: ↓9.8%;<br>Stage IIA: ↓2.9%;<br>Stage IIB: ↑3.8%;<br>Stage IIIA: ↑0.1%;<br>Stage IIIB: ↓0.2%;<br>Stage IIIC: ↓0.3%;<br>Stage IV: ↑1.1%;<br>p<0.001. |
| Knoll 2021*, Austria [39]    | ASI | Comparison 1: 16/03/2019 to 30/04/2019, and 01/11/2019 to 31/12/2019.<br><br>Comparison 2: 01/05/2019 to 02/11/2019; | Comparison 1 (two lockdowns): 16/03/2020 to 30/04/2020, and 03/11/2020 to 31/12/2020.<br><br>Comparison 2 (periods | 16/03/2020-30/04/2020 & 03/11/2020-31/12/2020 | Comparison 1 (two lockdowns):<br>Tis: 10 (9%) vs 2 (4%);<br>T1: 72 (62%) vs 24 (43%);<br>T2: 17 (15%) vs 13 (24%);<br>T3: 7 (6%) vs 6 (11%);<br>T4: 1(1%) vs 3 (6%);<br>Unknown: 8 (7%) vs 7 (12%).<br><br>Comparison 2 (periods between 2 lockdowns):<br>Tis: 14 (9%) vs 11 (7%);<br>T1: 78 (53%) vs 81 (52%);                                                                                                                                                                                                                                                                                                                                                                                       | Comparison 1 (two lockdowns):<br>Tis: ↓5%;<br>T1: ↓19%;<br>T2: ↑9%;<br>T3: ↑5%;<br>T4: ↑5%.<br>p=0.047.<br><br>Comparison 2 (periods between 2 lockdowns):                                                                                                                                                                                                                                                                 |

|                         |     |                                                                       |                                                                                                                                     |                       |                                                                                                                                                                                                                                                                                                       |                                                                                                                                                                                                                                                                                                                                                                                                                                                                                                     |
|-------------------------|-----|-----------------------------------------------------------------------|-------------------------------------------------------------------------------------------------------------------------------------|-----------------------|-------------------------------------------------------------------------------------------------------------------------------------------------------------------------------------------------------------------------------------------------------------------------------------------------------|-----------------------------------------------------------------------------------------------------------------------------------------------------------------------------------------------------------------------------------------------------------------------------------------------------------------------------------------------------------------------------------------------------------------------------------------------------------------------------------------------------|
|                         |     |                                                                       | between 2 lockdowns):<br>01/05/2020 to 02/11/2020.                                                                                  |                       | T2: 34 (23%) vs 33 (21%);<br>T3: 13 (9%) vs 23 (15%);<br>T4: 7 (5%) vs 7 (4%);<br>Unknown: 2 (1%) vs 2 (1%).                                                                                                                                                                                          | Tis: ↓2%;<br>T1: ↓1%;<br>T2: ↓2%;<br>T3: ↑6%;<br>T4: ↓1%.<br>p=0.708.                                                                                                                                                                                                                                                                                                                                                                                                                               |
| Linck 2022, France [45] | ASI | Reference: average 36 working days between 27/01/2019 and 01/07/2019. | Pre-lockdown: 27/01/2020 to 16/03/2020;<br><br>Lockdown: 17/03/2020 to 05/05/2020;<br><br>After-lockdown: 11/05/2020 to 01/07/2020. | 17/03/2020-11/05/2020 | T1: 66 (55%) vs 29 (67%) vs 13 (40%) vs 20 (34%);<br>T2: 37 (31%) vs 13 (30%) vs 13 (40%) vs 23 (39%);<br>T3: 9 (8%) vs 1 (2%) vs 1 (3%) vs 9 (15%);<br>T4: 8 (7%) vs 0 (0%) vs 5 (16%) vs 7 (12%);<br>N+: 39 (33%) vs 12 (28%) vs 16 (50%) vs 32 (54%);<br>M+: 3 (3%) vs 2 (5%) vs 3 (9%) vs 5 (8%). | <i>Reference vs Lockdown:</i><br>T1: ↓15%;<br>T2: ↑9%;<br>T3: ↓5%<br>T4: ↑9%<br>N+: ↑17%;<br>M+: ↑6%.<br><br><i>Reference vs After-lockdown:</i><br>T1: ↓21%, p=0.01;<br>T2: ↑8%;<br>T3 & T4: ↑12%, p=0.04;<br>N+: ↑21%, p=0.006;<br>M+: ↑5%, p=0.12.<br><br><i>Pre-lockdown vs Lockdown:</i><br>T1: ↓27%;<br>T2: ↑10%;<br>T3: ↑1%;<br>T4: ↑16%;<br>N+: ↑22%;<br>M+: ↑4%.<br><br><i>Pre-lockdown vs After-lockdown:</i><br>T1: ↓33%;<br>T2: ↑9%;<br>T3: ↑13%;<br>T4: ↑12%;<br>N+: ↑26%;<br>M+: ↑3%. |
| London 2022*, US [46]   | HCS | 01/01/2019 to 31/12/2019                                              | 01/01/2020 to 31/12/2020                                                                                                            | 01/03/2020-30/04/2020 | Stage I: 71.6% vs 72.3%;<br>Stage II: 14.7% vs 15.2%;<br>Stage III: 8.8% vs 8.2%;<br>Stage IV: 4.9% vs 4.3%                                                                                                                                                                                           | <i>Stage I:</i> ↑0.7%;<br><i>Stage II:</i> ↑0.5%;<br><i>Stage III:</i> ↓0.6%;<br><i>Stage IV:</i> ↓0.6%;<br>p>0.10.                                                                                                                                                                                                                                                                                                                                                                                 |

|                              |     |                          |                          |                       |                                                                                                                                                                                                                                                                                                                                                                                                                                                                           |                                                                                                                                                                                                                                                 |
|------------------------------|-----|--------------------------|--------------------------|-----------------------|---------------------------------------------------------------------------------------------------------------------------------------------------------------------------------------------------------------------------------------------------------------------------------------------------------------------------------------------------------------------------------------------------------------------------------------------------------------------------|-------------------------------------------------------------------------------------------------------------------------------------------------------------------------------------------------------------------------------------------------|
| Morais 2022, Portugal [50]   | ASI | 02/03/2019 to 01/07/2019 | 02/03/2020 to 01/07/2020 | 18/03/2020-02/05/2020 | Stage I: 263 (71.1%) vs 120 (52.9%);<br>Stage II: 65 (17.6%) vs 61 (26.9%);<br>Stage III: 20 (5.4%) vs 23 (10.1%);<br>Stage IV: 13 (3.5%) vs 14 (6.2%);<br>Unknown: 9 (2.4%) vs 9 (4.0%).                                                                                                                                                                                                                                                                                 | Stage I: ↓18.2%;<br>Stage II: ↑9.3%;<br>Stage III: ↑4.7%;<br>Stage IV: ↑2.7%;<br>Unknown: ↑1.6%;<br>P<0.001.                                                                                                                                    |
| Purushotham 2021, UK [58]    | HCS | 01/10/2019 to 31/03/2020 | 01/04/2020 to 30/09/2020 | 20/03/2020-NR         | Stage 1: 93 (39.9%) vs 55 (31.4%);<br>Stage 2: 69 (29.6%) vs 66 (37.7%);<br>Stage 3: 46 (19.7%) vs 31 (17.7%);<br>Stage 4: 25 (10.7%) vs 23 (13.1%).                                                                                                                                                                                                                                                                                                                      | Stage 1: ↓8.5%;<br>Stage 2: ↑8.1%;<br>Stage 3: ↓2.0%;<br>Stage 4: ↑2.4%;<br>p>0.05.                                                                                                                                                             |
| Ruiz-Medina 2021, Spain [60] | HCS | 13/03/2019 to 13/03/2020 | 13/03/2020 to 13/03/2021 | NR                    | Stage I-II: 587 (80.3%) vs 410 (76.6%);<br>Stage III-IV: 144 (19.7%) vs 125 (23.4%)                                                                                                                                                                                                                                                                                                                                                                                       | Stage I-II: ↓3.7%;<br>Stage III-IV: ↑3.7%;<br>p>0.05.                                                                                                                                                                                           |
| Tang 2022, US [67]           | HCS | 17/03/2019 to 17/05/2019 | 17/03/2020 to 17/05/2020 | 17/03/2020-17/05/2020 | Tis: 95 (14%) vs 21 (9%);<br>T1mi: 16 (2%) vs 6 (2%);<br>T1a: 46 (7%) vs 7 (3%);<br>T1b: 90 (13%) vs 19 (8%);<br>T1c: 177 (25%) vs 66 (27%);<br>T2: 217 (31%) vs 98 (40%);<br>T3: 37 (5%) vs 18 (7%);<br>T4: 21 (3%) vs 10 (4%);<br>Tx/T0: 4 (0%) vs 2 (1%).<br><br>N1: 125 (69%) vs 60 (68%);<br>N1m: 20 (11%) vs 8 (9%);<br>N2: 14 (8%) vs 9 (10%);<br>N3: 21 (12%) vs 11 (13%).<br><br>M0: 685 (97%) vs 227 (92%);<br>M1: 17 (2%) vs 18 (7%);<br>Mx: 1 (0%) vs 2 (1%). | Tis: ↓5%;<br>T1mi: 0%;<br>T1a: ↓4%;<br>T1b: ↓5%;<br>T1c: ↑2%;<br>T2: ↑9%;<br>T3: ↑2%;<br>T4: ↑1%;<br>Tx/T0: ↑1%;<br>p=0.02.<br><br>N1: ↓1%;<br>N1m: ↓2%;<br>N2: ↑2%;<br>N3: ↑1%;<br>p=0.88.<br><br>M0: ↓5%;<br>M1: ↑5%;<br>Mx: ↑1%;<br>p=0.001. |
| Tsibulak 2020, Austria [69]  | HCS | 16/03/2019 to 31/05/2019 | 16/03/2020 to 31/05/2020 | 16/03/2020-31/05/2020 | Tis: 34 (10%) vs 17 (8.5%);<br>T1: 149 (43%) vs 64 (32%);<br>T2-T4: 118 (34%) vs 48 (24%);<br>Tx: 48 (14%) vs 71 (35%).                                                                                                                                                                                                                                                                                                                                                   | Tis: ↓1.5%;<br>T1: ↓11%;<br>T2-T4: ↓10%;<br>Tx: ↑21%;<br>p<0.001.                                                                                                                                                                               |

|  |  |  |  |  |                                                                                         |                                                                                  |
|--|--|--|--|--|-----------------------------------------------------------------------------------------|----------------------------------------------------------------------------------|
|  |  |  |  |  | N0: 190 (54%) vs 87 (43%);<br>N1-3: 102 (29%) vs 33 (16%);<br>Nx: 59 (17%) vs 81 (40%). | <i>N0: ↓11%;</i><br><i>N1-3: ↓13%;</i><br><i>Nx: ↑23%;</i><br><i>p&lt;0.001.</i> |
|--|--|--|--|--|-----------------------------------------------------------------------------------------|----------------------------------------------------------------------------------|

HCS=Healthcare (or community-based) system/network/database, ASI=A single institution or department, CIR=Cancer or imaging registry, NR=Not reported, DCIS=Ductal carcinoma in situ.  
*Italics*: computed data (see Appendix C).

\* Study sample also contains in situ tumour, and/or benign tumour cases.

AppxTable F.8: Summary of mammography volume

| Study, Country/Region (n=9)         | Health service setting | Pre-pandemic                              |                                          | Pandemic                                     | a. Volume of mammography exams*                                                                                                                                                            |                                                                                                                                                           |
|-------------------------------------|------------------------|-------------------------------------------|------------------------------------------|----------------------------------------------|--------------------------------------------------------------------------------------------------------------------------------------------------------------------------------------------|-----------------------------------------------------------------------------------------------------------------------------------------------------------|
|                                     |                        | Time period                               | Time period                              | Services suspension/ lockdown                | Pre-pandemic vs Pandemic (data are frequency (N) unless specified)                                                                                                                         | Relative change in outcome (unless specified)                                                                                                             |
| Alelyani 2021, Saudi Arabia [2]     | HCS                    | 01/01/2019 to 31/12/2019                  | 01/01/2020 to 31/12/2020                 | 23/03/2020-NR                                | Mean monthly volume (95%CI): 77.58 (4.14-151.0) vs 64.42 (-11.28-140.1).<br><br>Jan-Mar: 217 vs 262;<br>Apr-Jun: 147 vs 57;<br>Jul-Sep: 231 vs 80;<br>Oct-Dec: 336 vs 374.                 | Mean monthly volume: ↓16.96%, p=0.39.<br><br>Jan-Mar: ↑20.74%;<br>Apr-Jun: ↓61.22%;<br>Jul-Sep: ↓65.37%;<br>Oct-Dec: ↑11.31%.                             |
| Chou 2020, Taiwan [16]              | ASI                    | Week1, 2019 to Week 22, 2019              | Week 1, 2020 to Week 22, 2020            | NR                                           | 4816 vs 3041                                                                                                                                                                               | ↓37%, p<0.001                                                                                                                                             |
| Crisan 2021, Romania [19]           | ASI                    | 01/03/2019 to 30/10/2019                  | 01/03/2020 to 30/10/2020                 | 22/03/2020-14/05/2020                        | 1439 vs 1169                                                                                                                                                                               | ↓19.4%, p=0.97                                                                                                                                            |
| Doshi 2021, US [24]                 | HCS                    | 02/01/2019 to 19/07/2019                  | 02/01/2020 to 17/07/2020                 | 22/03/2020-08/06/2020                        | Total: 22109 vs 14594.<br><br>Average daily volume:<br>Pre-peak (03/02-02/03) vs Peak (01/04-28/04) vs After-peak (19/06-17/07): 168.8 vs 13.3 vs 142.9.                                   | Total: ↓34.0%<br><br>Average daily volume:<br>Pre-peak vs Peak: ↓92.1%.<br>Pre-peak vs After-peak: ↓15.3%.                                                |
| Lacson 2021, US [42]                | ASI                    | Before shutdown: 01/01/2020 to 08/03/2020 | After shutdown: 07/06/2020 to 15/07/2020 | NR                                           | Proportion of mammography among total imaging examinations:<br>All care settings: 12.5% (7386/59080) vs 17.3% (3385/19594);<br>Outpatients only: 14.7% (7383/50194) vs 20.0% (3383/16946). | Absolute change in proportion of mammography among total imaging examinations:<br>All care settings: ↑4.8%, p<0.001;<br>Outpatients only: ↑5.3%, p<0.001. |
| Lang 2020, US [43]                  | ASI                    | 05/01/2020 to 07/03/2020                  | 22/03/2020 to 16/05/2020                 | NR                                           | Average weekly volume (95%CI):<br>Main hospital: 815 (764-866) vs 69 (51-86);<br>Affiliated imaging centres: 1471 (1390-1553) vs 118 (74-162)                                              | Average weekly volume:<br>Main hospital: ↓92%, p<0.001;<br>Affiliated imaging centres: ↓92%, p<0.001.                                                     |
| Le Bihan Benjamin 2022, France [44] | HCS                    | 01/01/2019 to 31/12/2019                  | 01/01/2020 to 31/12/2020                 | 17/03/2020-11/05/2020; 28/10/2020-15/12/2020 | 5132158 vs 4639622                                                                                                                                                                         | ↓9.6%                                                                                                                                                     |
| Naidich 2020, US [51]               | HCS                    | Week 1, 2019 to Week 16, 2019             | Week 1, 2020 to Week 16, 2020            | 27/03/2020-NR                                | Total: 14320 vs 11232.                                                                                                                                                                     | Total: ↓21.56%.<br><br>Mean weekly volume during weeks 10-16: ↓58.42%, p<0.013                                                                            |

|                             |                        |                                         |                                                                   |                                       | Mean weekly volume (95%CI) during weeks 10-16: 919.0 (95%CI: 829.6-1008.4) vs 382.1 (95%CI: 4.5-759.8)                                                 |                                                                                                                                                    |  |
|-----------------------------|------------------------|-----------------------------------------|-------------------------------------------------------------------|---------------------------------------|--------------------------------------------------------------------------------------------------------------------------------------------------------|----------------------------------------------------------------------------------------------------------------------------------------------------|--|
| Patt 2020, US [54]          | HCS                    | 01/03/2019 to 31/07/2019                | 01/03/2020 to 31/07/2020                                          | NR                                    | NR                                                                                                                                                     | Mar: ↓49.83%;<br>Apr: ↓84.77%;<br>May: ↓38.59%;<br>Jun: ↑9.19%;<br>Jul: ↓8.91%.                                                                    |  |
| Study, Country/Region (n=6) | Health service setting | Pre-pandemic                            |                                                                   | Pandemic                              |                                                                                                                                                        | b. Volume of diagnostic mammography exams                                                                                                          |  |
|                             |                        | Time period                             | Time period                                                       | Services suspension/ lockdown         | Pre-pandemic vs Pandemic (data are frequency (N) unless specified)                                                                                     | Relative change in outcome                                                                                                                         |  |
| Chou 2020, Taiwan [16]      | ASI                    | Week1, 2019 to Week 22, 2019            | Week 1, 2020 to Week 22, 2020                                     | NR                                    | NR                                                                                                                                                     | ↓6%, p=0.14                                                                                                                                        |  |
| Collado-Mesa 2020, US [18]  | HCS                    | 1/04/2018-2019 to 30/04/2018-2019       | 01/04/2020 to 30/04/2020                                          | 20/03/2020-Mid May to Early June 2020 | 1807 vs 354                                                                                                                                            | ↓80%                                                                                                                                               |  |
| Kang 2021, Korea [35]       | HCS                    | 01/02/2019 to 31/07/2019                | 01/02/2020 to 31/07/2020                                          | NR                                    | Total volume of both mammography and breast sonography: 43288 vs 34354.<br><br>Peak (Feb-Apr): 19388 vs 13546;<br>After-peak (May-Jul): 23900 vs 20808 | <i>Total: ↓20.6%.</i><br><br><i>Peak (Feb-Apr): ↓30.1%;</i><br><i>After-peak (Feb-Apr): ↓12.9%.</i>                                                |  |
| Norbash 2020, US [52]       | HCS                    | Week 1, 2019 to Week 21, 2019           | Week 1, 2020 to Week 21, 2020                                     | NR                                    | NR                                                                                                                                                     | Weekly change range:<br>Weeks 1-10: ↑9%-17%;<br>Weeks 11-13: ↓0%-53%;<br>Weeks 14-17: ↓71%-80% (Nadir: ↓80% in week 16);<br>Weeks 18-21: ↓47%-68%. |  |
| Sprague 2021, US [64]       | CIR                    | 01/01/2019 to 31/07/2019                | 01/01/2020 to 31/07/2020                                          | NR                                    | 44610 vs 35647                                                                                                                                         | ↓20.1% (95%CI**: 15.4-24.6%)                                                                                                                       |  |
| Tachibana 2021, Brazil [66] | ASI                    | Comparison 1: 24/03/2019 to 21/06/2019; | Comparison 1 (during social isolation): 24/03/2020 to 21/06/2020; | 26/03/2020-21/06/2020                 | Comparison 1 (during social isolation): 5844 vs 948;                                                                                                   | Comparison 1 (during social isolation): ↓83.8%;                                                                                                    |  |



|  |  |                                              |                                                                             |  |                                                          |                                                 |
|--|--|----------------------------------------------|-----------------------------------------------------------------------------|--|----------------------------------------------------------|-------------------------------------------------|
|  |  | Comparison 2:<br>22/06/2019 to<br>31/12/2019 | Comparison 2<br>(after social<br>isolation):<br>22/06/2020 to<br>31/12/2020 |  | Comparison 2 (after social isolation): 10379 vs<br>9891. | Comparison 2 (after social isolation):<br>↓4.7% |
|--|--|----------------------------------------------|-----------------------------------------------------------------------------|--|----------------------------------------------------------|-------------------------------------------------|

HCS=Healthcare (or community-based) system/network/database, ASI=A single institution or department, CIR=Cancer or imaging registry, NR=Not reported, CI=Confidence interval.

Light grey cells: plot-extracted data (see Appendix C); *Italics*: computed data (see Appendix C).

\* Refers to data came from medical imaging studies, or from studies with a mixed screening and symptomatic population.

\*\* Adjusted for imaging registry site.

## References

1. Al-Kuwari MG, Abdulmalik MA, et al., *The impact of COVID-19 pandemic on the preventive services in Qatar*. J Public Health Res, 2021. 10(1): p. 1910.
2. Alelyani M, Alghamdi A, et al., *The Impact of the COVID-19 Pandemic on Medical Imaging Case Volumes in Aseer Region: A Retrospective Study*. Medicines (Basel), 2021. 8(11): p. 12.
3. Amornsiripanitch N, Chikarmane SA, et al., *Patients characteristics related to screening mammography cancellation and rescheduling rates during the COVID-19 pandemic*. Clin Imaging, 2021. 80: p. 205-10.
4. Amram O, Robison J, et al., *Socioeconomic and Racial Inequities in Breast Cancer Screening during the COVID-19 Pandemic in Washington State*. JAMA Network Open, 2021. (no pagination)(5): p. e2110946.
5. Bakouny Z, Paciotti M, et al., *Cancer Screening Tests and Cancer Diagnoses During the COVID-19 Pandemic*. JAMA Oncol, 2021. 7(3): p. 458-60.
6. Bansal GJ and Saleem Z, *The symptomatic breast services in a university hospital: pandemic peak compared to the pre-pandemic year and future implications*. Ir J Med Sci, 2022.
7. Bentley H, Woods R, et al., *Hindsight is 2020: Understanding the Impact of the COVID-19 Pandemic on a Provincial Population-Based Breast Screening Program*. Can Assoc Radiol J, 2021: p. 8465371211036902.
8. Bessa JDF, *Breast Imaging Hindered During Covid-19 Pandemic, in Brazil*. Rev. Saude Publica, 2021. 55: p. 1-8.
9. Blay JY, Boucher S, et al., *Delayed care for patients with newly diagnosed cancer due to COVID-19 and estimated impact on cancer mortality in France*. ESMO Open, 2021. 6(3) (no pagination).
10. Bonadio RC, Messias AP, et al., *Impact of the COVID-19 pandemic on breast and cervical cancer stage at diagnosis in Brazil*. ecancermedicalsience, 2021. 15 (no pagination).
11. Borsky K, Shah K, et al., *Pattern of breast cancer presentation during the COVID-19 pandemic: results from a cohort study in the UK*. Future Oncol, 2022. 18(4): p. 437-43.
12. Brugel M, Carlier C, et al., *Dramatic Changes in Oncology Care Pathways During the COVID-19 Pandemic: The French ONCOCARE-COV Study*. Oncologist, 2021. 26(2): p. e338-e41.
13. Chen RC, Haynes K, et al., *Association of Cancer Screening Deficit in the United States With the COVID-19 Pandemic*. JAMA Oncol, 2021. 7(6): p. 878-84.
14. Chiarelli AM, Walker MJ, et al., *Adherence to guidance for prioritizing higher risk groups for breast cancer screening during the COVID-19 pandemic in the Ontario Breast Screening Program: a descriptive study*. CMAJ Open, 2021. 9(4): p. E1205-E12.
15. Chou CP and Lin HS, *Delayed breast cancer detection in an asian country (Taiwan) with low covid-19 incidence*. Cancer Management and Research, 2021. 13: p. 5899-906.
16. Chou CP, Pan HB, et al., *Impact of the COVID-19 pandemic on the volume of mammography examinations in Southern Taiwan*. Breast J, 2020. 27(1): p. 89-91.
17. Citgez B, Yigit B, et al., *The change in incidence of breast cancer by stage: How is it changed after the COVID-19 pandemic? a single-center retrospective study*. Annali Italiani di Chirurgia, 2021. 92(5): p. 488-93.
18. Collado-Mesa F, Kaplan SS, et al., *Impact of COVID-19 on breast imaging case volumes in South Florida: A multicenter study*. Breast Journal, 2020. 26(11): p. 2316-9.
19. Crisan C, Cainap C, et al., *Decrease of oncological patients' hospital visits during Covid-19 pandemic; the experience of a tertiary Romanian centre*. J BUON, 2021. 26(3): p. 1121-6.
20. Dabkeviciene D, Vincerzevskiene I, et al., *The Impact of the COVID-19 Pandemic on Cancer Patient's Management-Lithuanian Cancer Center Experience*. Healthcare (Basel), 2021. 9(11): p. 09.
21. de Degani Lopez G, Duarte L, et al., *The impact of the COVID-19 pandemic on cancer care in the public health subsector, province of Santa Fe, Argentina*. ecancermedicalsience, 2021. 15 (no pagination).

22. De Vincentiis L, Carr RA, et al., *Cancer diagnostic rates during the 2020 'lockdown', due to COVID-19 pandemic, compared with the 2018-2019: An audit study from cellular pathology*. Journal of Clinical Pathology, 2021. 74(3): p. 187-9.
23. DeGroff A, Miller J, et al., *COVID-19 impact on screening test volume through the National Breast and Cervical Cancer early detection program, January-June 2020, in the United States*. Preventive medicine, 2021. 151: p. 106559.
24. Doshi AH, Kihira S, et al., *Impact of COVID-19 social distancing regulations on outpatient diagnostic imaging volumes and no-show rates*. Clin Imaging, 2021. 76: p. 65-9.
25. Drescher CW, Bograd AJ, et al., *Cancer case trends following the onset of the COVID-19 pandemic: A community-based observational study with extended follow-up*. Cancer, 2022. 128(7): p. 1475-82.
26. Eijkelboom AH, de Munck L, et al., *Impact of the suspension and restart of the Dutch breast cancer screening program on breast cancer incidence and stage during the COVID-19 pandemic*. Preventive medicine, 2021. 151: p. 106602.
27. Fedewa SA, Cotter MM, et al., *Changes in breast cancer screening rates among 32 community health centers during the COVID-19 pandemic*. Cancer., 2021.
28. Ferrara G, De Vincentiis L, et al., *Cancer Diagnostic Delay in Northern and Central Italy During the 2020 Lockdown Due to the Coronavirus Disease 2019 Pandemic*. Am J Clin Pathol, 2021. 155(1): p. 64-8.
29. Fisher-Borne M, Isher-Witt J, et al., *Understanding COVID-19 impact on cervical, breast, and colorectal cancer screening among federally qualified healthcare centers participating in "Back on track with screening" quality improvement projects*. Preventive medicine, 2021. 151: p. 106681.
30. Gathani T, Reeves G, et al., *Impact of the COVID-19 pandemic on breast cancer referrals and diagnoses in 2020 and 2021: a population-based study in England*. Br J Surg, 2022. 109(2): p. e29-e30.
31. Gorin SNS, Jimbo M, et al., *The future of cancer screening after COVID-19 may be at home*. Cancer, 2021. 127(4): p. 498-503.
32. Guven DC, Sahin TK, et al., *Newly diagnosed cancer and the COVID-19 pandemic: tumour stage migration and higher early mortality*. BMJ Support Palliat Care, 2021. 28.
33. Jidkova S, Hoeck S, et al., *Flemish population-based cancer screening programs: impact of COVID-19 related shutdown on short-term key performance indicators*. BMC Cancer, 2022. 22(1): p. 183.
34. Kaltofen T, Hagemann F, et al., *Changes in gynecologic and breast cancer diagnoses during the first wave of the COVID-19 pandemic: analysis from a tertiary academic gyneco-oncological center in Germany*. Archives of Gynecology and Obstetrics., 2021.
35. Kang YJ, Baek JM, et al., *Impact of the COVID-19 Pandemic on the Diagnosis and Surgery of Breast Cancer: A Multi-Institutional Study*. J Breast Cancer, 2021. 24(6): p. 491-503.
36. Kempf E, Lame G, et al., *New cancer cases at the time of SARS-Cov2 pandemic and related public health policies: a persistent and concerning decrease long after the end of the national lockdown*. European Journal of Cancer, 2021. 150: p. 260-7.
37. Kidwai N, *Routine cancer screening delays due to pandemic at veteran affairs*. J Natl Med Assoc, 2022. 114(1): p. 12-5.
38. Kim E, Kojima N, et al., *Impact of COVID-19 on Primary Care Quality Measures in an Academic Integrated Health System*. J Gen Intern Med, 2022. 26: p. 26.
39. Knoll K, Reiser E, et al., *The impact of COVID-19 pandemic on the rate of newly diagnosed gynecological and breast cancers: a tertiary center perspective*. Arch Gynecol Obstet, 2021.
40. Koczkodaj P, Sulkowska U, et al., *SARS-CoV-2 as a new possible long-lasting determining factor impacting cancer death numbers. Based on the example of breast, colorectal and cervical cancer in Poland*. Nowotwory, 2021. 71(1): p. 42-6.
41. Labaki C, Bakouny Z, et al., *Recovery of cancer screening tests and possible associated disparities after the first peak of the COVID-19 pandemic*. Cancer Cell, 2021. 39(8): p. 1042-4.
42. Lacson R, Shi J, et al., *Exacerbation of Inequities in Use of Diagnostic Radiology During the Early Stages of Reopening After COVID-19*. Journal of the American College of Radiology, 2021. 18(5): p. 696-703.

43. Lang M, Yeung T, et al., *Imaging Volume Trends and Recovery During the COVID-19 Pandemic: A Comparative Analysis Between a Large Urban Academic Hospital and Its Affiliated Imaging Centers*. Academic Radiology, 2020. 27(10): p. 1353-62.
44. Le Bihan Benjamin C, Simonnet JA, et al., *Monitoring the impact of COVID-19 in France on cancer care: a differentiated impact*. Sci Rep, 2022. 12(1): p. 4207.
45. Linck PA, Garnier C, et al., *Impact of the COVID-19 lockdown in France on the diagnosis and staging of breast cancers in a tertiary cancer centre*. Eur Radiol, 2022. 32(3): p. 1644-51.
46. London JW, Fazio-Eynullayeva E, et al., *Evolving Effect of the COVID-19 Pandemic on Cancer-Related Encounters*. JCO Clin Cancer Inform, 2022. 6: p. e2100200.
47. Losurdo P, Samardzic N, et al., *The real-world impact of breast and colorectal cancer surgery during the SARS-CoV-2 pandemic*. Updates Surg, 2022. 03.
48. Lowry KP, Bissell M, et al., *Breast Biopsy Recommendations and Breast Cancers Diagnosed during the COVID-19 Pandemic*. Radiology, 2021: p. 211808.
49. Miller MM, Meneveau MO, et al., *Impact of the COVID-19 pandemic on breast cancer screening volumes and patient screening behaviors*. Breast Cancer Research and Treatment, 2021. 189(1)(1): p. 237-46.
50. Morais S, Antunes L, et al., *The impact of the coronavirus disease 2019 pandemic on the diagnosis and treatment of cancer in Northern Portugal*. Eur J Cancer Prev, 2022. 31(2): p. 204-14.
51. Naidich JJ, Boltyenkov A, et al., *Impact of the Coronavirus Disease 2019 (COVID-19) Pandemic on Imaging Case Volumes*. J Am Coll Radiol, 2020. 17(7): p. 865-72.
52. Norbash AM, Moore AV, Jr., et al., *Early-Stage Radiology Volume Effects and Considerations with the Coronavirus Disease 2019 (COVID-19) Pandemic: Adaptations, Risks, and Lessons Learned*. J Am Coll Radiol, 2020. 17(9): p. 1086-95.
53. O'Brien AC, McCartan D, et al., *The COVID-19 impact on symptomatic breast cancer referrals and diagnosis*. Irish Medical Journal, 2021. 114(4) (no pagination).
54. Patt D, Gordan L, et al., *Impact of COVID-19 on cancer care: How the pandemic is delaying cancer diagnosis and treatment for American seniors*. JCO Clinical Cancer Informatics, 2020(4): p. 1059-71.
55. Patt D, Gordan L, et al., *Considerations to increase rates of breast cancer screening across populations*. Am J Manag Care, 2022. 28(3 Spec. No.): p. 14.
56. Peacock HM, Tambuyzer T, et al., *Decline and incomplete recovery in cancer diagnoses during the COVID-19 pandemic in Belgium: a year-long, population-level analysis*. ESMO Open, 2021. 6(4): p. 100197.
57. Peng SM, Yang KC, et al., *Impact of the COVID-19 pandemic on a population-based breast cancer screening program*. Cancer, 2020. 126(24): p. 5202-5.
58. Purushotham A, Roberts G, et al., *The impact of national non-pharmaceutical interventions ('lockdowns') on the presentation of cancer patients*. ecancermedicalsecience, 2021. 15 (no pagination).
59. Ribeiro CM, Correa FM, et al., *Short-term effects of the COVID-19 pandemic on cancer screening, diagnosis and treatment procedures in Brazil: a descriptive study, 2019-2020*. Epidemiol Serv Saude, 2022. 31(1): p. e2021405.
60. Ruiz-Medina S, Gil S, et al., *Significant Decrease in Annual Cancer Diagnoses in Spain during the COVID-19 Pandemic: A Real-Data Study*. Cancers (Basel), 2021. 13(13).
61. Salem C, Hajj M-A, et al., *Radiology management of a 'breast unit' during COVID-19 pandemic: a single institution experience*. Future Oncology, 2020. 16(35): p. 2917-22.
62. Shen CT, Hsieh HM, et al., *Different impacts of cancer types on cancer screening during COVID-19 pandemic in Taiwan*. J Formos Med Assoc, 2022. 15: p. 15.
63. Skovlund CW, Friis S, et al., *Hidden morbidities: drop in cancer diagnoses during the COVID-19 pandemic in Denmark*. Acta Oncol, 2021. 60(1): p. 20-3.
64. Sprague BL, Lowry KP, et al., *Changes in Mammography Use by Women's Characteristics During the First 5 Months of the COVID-19 Pandemic*. Journal of the National Cancer Institute, 2021. 113(9): p. 1161-7.
65. Sutherland K, Chessman J, et al., *Impact of COVID-19 on healthcare activity in NSW, Australia*. Public Health Res Pract, 2020. 30(4).
66. Tachibana BMT, Ribeiro RLM, et al., *The delay of breast cancer diagnosis during the COVID-19 pandemic in Sao Paulo, Brazil*. Einstein (Sao Paulo), 2021. 19: p. eAO6721.

67. Tang A, Neeman E, et al., *Care in the time of COVID-19: impact on the diagnosis and treatment of breast cancer in a large, integrated health care system*. Breast Cancer Res Treat, 2022. 191(3): p. 665-75.
68. Tsai HY, Chang YL, et al., *Effects of the COVID-19 pandemic on breast cancer screening in Taiwan*. Breast, 2020. 54: p. 52-5.
69. Tsibulak I, Reiser E, et al., *Decrease in gynecological cancer diagnoses during the COVID-19 pandemic: an Austrian perspective*. Int J Gynecol Cancer, 2020. 30(11): p. 1667-71.
70. van Wyk AC, de Jager LJ, et al., *The initial impact of the COVID-19 pandemic on the diagnosis of new cancers at a large pathology laboratory in the public health sector, Western Cape Province, South Africa*. South African Medical Journal, 2021. 111(6): p. 570-4.
71. Velazquez AI, Hayward JH, et al., *Trends in Breast Cancer Screening in a Safety-Net Hospital during the COVID-19 Pandemic*. JAMA Network Open, 2021. 4(8) (no pagination): p. e2119929.
72. Vrdoljak E, Balja MP, et al., *COVID-19 Pandemic Effects on Breast Cancer Diagnosis in Croatia: A Population- and Registry-Based Study*. Oncologist, 2021. 26(7): p. e1156-e60.
73. Walker MJ, Meggetto O, et al., *Measuring the impact of the COVID-19 pandemic on organized cancer screening and diagnostic follow-up care in Ontario, Canada: A provincial, population-based study*. Prev Med, 2021. 151: p. 106586.
74. Whaley CM, Pera MF, et al., *Changes in Health Services Use among Commercially Insured US Populations during the COVID-19 Pandemic*. JAMA Network Open, 2020. 3(11) (no pagination).
